# Supplementary material
Source: Royal Society of Chemistry journal article supplement (doi:10.1039/d6dt00618c)
Supplement: d6dt00618c1.pdf [file d6dt00618c1.pdf]

*Electronic Supplementary Information*

**Experimental and theoretical studies on the (co)cyclotrimerization of alkynes (and ethylene) in a TpRh compound.**

Giovanni Bottari,<sup>a</sup> Juan José Moreno,<sup>a</sup> Verónica Salazar,<sup>b</sup> Jesús Campos,<sup>a</sup> Kurt Mereiter,<sup>c</sup> Nuria Rendón,<sup>a</sup> Jesús Emmanuel Cerón,<sup>b</sup> Joaquín López-Serrano,<sup>\*a</sup> Margarita Paneque,<sup>\*a</sup> and Laura L. Santos,<sup>\*a</sup>

<sup>a</sup> Instituto de Investigaciones Químicas, Departamento de Química Inorgánica, and Centro de Innovación en Química Avanzada (ORFEO-CINQA), Consejo Superior de Investigaciones Científicas (CSIC) and Universidad de Sevilla, Av. Américo Vespucio 49, Isla de la Cartuja, 41092 Sevilla, Spain.

<sup>b</sup> Área Académica de Químicas, Universidad Autónoma del Estado de Hidalgo, 42184 Mineral de la Reforma, Hidalgo, México.

<sup>c</sup> Department of Chemistry, Vienna University of Technology, Getreidemarkt 9/164SC, A-1060 Vienna, Austria.

E-mail: [laura@iiq.csic.es](mailto:laura@iiq.csic.es); [joaquin.lopez@iiq.csic.es](mailto:joaquin.lopez@iiq.csic.es); [paneque@iiq.csic.es](mailto:paneque@iiq.csic.es)

## Table of Contents

|                                                                                                                                                                                                                                            |    |
|--------------------------------------------------------------------------------------------------------------------------------------------------------------------------------------------------------------------------------------------|----|
| 1 X-ray structure determination for the Rh complexes <b>3</b> , <b>4</b> , <b>5</b> , <b>8</b> , and <b>9</b> .....                                                                                                                        | 3  |
| 2. COMPUTATIONAL DETAILS .....                                                                                                                                                                                                             | 38 |
| 2.1 Ligand exchange. Relaxed Potential Energy (PES) scans concerning ethylene release at $\kappa^2$ - <b>A</b> · <b>C</b> <sub>2</sub> <b>H</b> <sub>2</sub> and $\kappa^2$ - <b>B</b> · <b>C</b> <sub>2</sub> <b>H</b> <sub>4</sub> ..... | 38 |
| 2.2 Carbon-carbon coupling occurring at $\kappa^2$ -Tp species.....                                                                                                                                                                        | 43 |
| 2.3 Electronic structure of intermediates on the way of formation of <b>12</b> .....                                                                                                                                                       | 44 |
| 2.4 Alternative initial step in the formation of <b>12</b> .....                                                                                                                                                                           | 47 |
| 3. NMR spectra for complexes <b>3-5</b> , <b>8-19</b> .....                                                                                                                                                                                | 48 |

## 1. X-ray structure determination for the Rh complexes **3**, **4**, **5**, **8**, and **9**.

Single crystals for X-ray diffraction studies of the five compounds reported herein were obtained by slow evaporation from hexane:diethyl ether (**3**, **4**, **5**), hexane:CH<sub>2</sub>Cl<sub>2</sub> (**8**), or chloroform (**9**) solutions. Solid state compound **4** is an *n*-hexane hemisolvate of the respective Rh complex. Solid state compound **8** is a 1:1 cocrystal of the respective Rh complex and di-*tert*-butyl acetylenedicarboxylate (DTBAD), which was used in excess as an educt for the synthesis of the complex. Solid state compound of **9** is a CHCl<sub>3</sub> monosolvate. X-ray diffraction data were collected at *T* = 100 and 173 K (Bruker Kryoflex cooler) either on a Bruker Smart APEX CCD diffractometer using graphite-monochromatized Mo-K $\alpha$  radiation ( $\lambda$  = 0.71073 Å) from a sealed tube (**3**, **4**, **5** and **8**) or on a Bruker APEX-II CCD diffractometer using Mo-K $\alpha$  radiation generated by an Incoatec microfocus source (**9**) (Centro de Investigaciones, Tecnología e Innovación Universidad de Sevilla, CITIUS). Data collection was carried out by means of fine-sliced  $\omega$ - and  $\varphi$ -scans covering mostly complete Ewald spheres with  $\theta_{\max}$  = 30 - 30.6°. The frames were integrated with program *SAINT* and corrections for absorption and  $\lambda/2$  effects were applied with program *SADABS*. After structure solution with program *SHELXS97* and direct methods, refinement on  $F^2$  was carried out with the program *SHELXL97*. Non-hydrogen atoms were refined anisotropically. All H atoms were placed in calculated positions, except those of the coordinated water molecule in **9**, and thereafter treated as riding using AFIX 137 instructions for CH<sub>3</sub> groups. Crystallographic data are compiled in Table S1. Structural diagrams of the complexes (Figs. S1 – S6) and Tables (Tab. S2 – S6) with selected geometric parameters are given below. Atomic parameters are provided in CIF-format as Supporting Information (**3** (11-811), **4** (12-831), **5** (13-864), **8** (14-790), **9** (15-jcm2812a)). CCDC-1411328 – 1411332 (for **3**, **4**, **5**, **8** and **9**, respectively) contain the supplementary crystallographic data for this paper. These data can be obtained free of charge from The Cambridge Crystallographic Data Centre via [www.ccdc.cam.ac.uk/data\\_request/cif](http://www.ccdc.cam.ac.uk/data_request/cif).

As stated above, the solid state structure of **4** is a hemisolvate of the Rh-complex in general position and a centrosymmetric *n*-hexane molecule. The *n*-hexane molecule adopts the usual planar zig-zag carbon chain and is with its long direction oriented approximately parallel to the *a*-axis of the crystallographic unit-cell. All hexane molecules are located in the crystal lattice in infinite narrow channels, which extend parallel to *a* at  $y=0, z=1/2$  and  $y=1/2, z=0$  (Fig. S2b). The *n*-hexane molecule refined to an occupancy of

85(1)%. The chemical formula and quantities derived quantities reported in Table S1 are given for an idealized 100% occupancy.

The solid state structure of **8** is an unusual 1:1 cocrystal of the Rh-complex **8** with the reagent DTBAD (di-*tert*-butyl acetylenedicarboxylate), a solid at room temperature, which was used in excess for the synthesis of the Rh-complex. The DTBAD molecule in **8** shows a *gauche*-like conformation with the interplanar angle between its two COO groups measuring 77.5°. A projection of the entire crystal structure of **8** showing the arrangement of the DTBAD molecules between the Rh-complexes is presented in Fig. S4b.

The crystal structure of **9** consists of dimers bound through four H bonds between molecules crystallographically related by an inversion center (Fig. S6). The oxygen center (O5) of the coordinated water molecule acts as a donor to form two hydrogen bonds of intermediate strength (T. Steiner, *Angew. Chem. Int. Ed.* **2002**, *41*, 8-76) with the oxygen atoms O2 and O3 as acceptors. The dimensions of these hydrogen bonds are: O5...O2 = 2.861(2) Å, O5...O3 = 2.631(2) Å, H5B...O2 = 2.07 Å, H5A...O3 = 1.87 Å (for O5-H = 0.84 Å), O5-H5B...O2 = 157°, O5-H5A...O3 = 150° (for H5A-O5-H5B = 104°). Thus, the hydrogen bond to the terminal carboxyl oxygen O3 is distinctly stronger than that to O2. Interestingly, also the terminal carboxyl oxygen O1 is involved in a pronounced hydrogen bond interaction, here with the C-H group of a CHCl<sub>3</sub> solvate molecule as the donor, C30...O1 = 3.005(2) Å, C30-H30 = 1.00 Å, H30...O1 = 2.04 Å, and C30-H30...O1 = 162° (Fig. S6).

Computer programs used:

Bruker programs: *SAINT*, version 6.36A and higher; *SADABS*, versions 2.05 and 2006; *SHELXTL*, version 2008/4 (Bruker AXS Inc., Madison, WI, 2009).

*SHELXS97* and *SHELXL97*: Sheldrick, G. M. *Acta Cryst.* **2008**, *A64*, 112-122.

**Table S1.** Crystal data and structure refinement for compounds **3**, **4** and **5**.

|                                                                          | <b>3</b> (11-811)                                                 | <b>4</b> (12-831)                                                                                                                                                           | <b>5</b> (13-864)                                                 |
|--------------------------------------------------------------------------|-------------------------------------------------------------------|-----------------------------------------------------------------------------------------------------------------------------------------------------------------------------|-------------------------------------------------------------------|
| formula                                                                  | C <sub>25</sub> H <sub>36</sub> BN <sub>6</sub> O <sub>4</sub> Rh | C <sub>38</sub> H <sub>57</sub> BN <sub>6</sub> O <sub>8</sub> Rh<br>[C <sub>35</sub> H <sub>50</sub> BN <sub>6</sub> O <sub>8</sub> Rh·½(C <sub>6</sub> H <sub>14</sub> )] | C <sub>35</sub> H <sub>50</sub> BN <sub>6</sub> O <sub>8</sub> Rh |
| fw                                                                       | 598.32                                                            | 839.62                                                                                                                                                                      | 796.53                                                            |
| cryst.size, mm                                                           | 0.64 × 0.26 × 0.19                                                | 0.57 × 0.20 × 0.19                                                                                                                                                          | 0.45 × 0.25 × 0.18                                                |
| crystal system                                                           | triclinic                                                         | monoclinic                                                                                                                                                                  | monoclinic                                                        |
| space group                                                              | <i>P</i> -1 (no. 2)                                               | <i>P</i> 2 <sub>1</sub> / <i>c</i> (no. 14)                                                                                                                                 | <i>P</i> 2 <sub>1</sub> / <i>c</i> (no. 14)                       |
| <i>a</i> , Å                                                             | 8.9717(5)                                                         | 10.4464(4)                                                                                                                                                                  | 16.6055(9)                                                        |
| <i>b</i> , Å                                                             | 8.9893(5)                                                         | 15.8720(6)                                                                                                                                                                  | 17.9739(10)                                                       |
| <i>c</i> , Å                                                             | 17.3228(9)                                                        | 25.0317(10)                                                                                                                                                                 | 13.6837(7)                                                        |
| $\alpha$ , deg                                                           | 84.085(2)                                                         | 90                                                                                                                                                                          | 90                                                                |
| $\beta$ , deg                                                            | 86.363(2)                                                         | 90.839(1)                                                                                                                                                                   | 107.888(1)                                                        |
| $\gamma$ , deg                                                           | 79.803(2)                                                         | 90                                                                                                                                                                          | 90                                                                |
| <i>V</i> , Å <sup>3</sup>                                                | 1366.23(13)                                                       | 4149.9(3)                                                                                                                                                                   | 3886.7(4)                                                         |
| <i>T</i> , K                                                             | 100                                                               | 173                                                                                                                                                                         | 173                                                               |
| <i>Z</i>                                                                 | 2                                                                 | 4                                                                                                                                                                           | 4                                                                 |
| $\rho_{\text{calc}}$ , g cm <sup>-3</sup>                                | 1.454                                                             | 1.344                                                                                                                                                                       | 1.361                                                             |
| $\mu$ , mm <sup>-1</sup> (MoK $\alpha$ )                                 | 0.667                                                             | 0.467                                                                                                                                                                       | 0.495                                                             |
| <i>F</i> (000)                                                           | 620                                                               | 1764                                                                                                                                                                        | 1664                                                              |
| absorption corrections                                                   | multi-scan, 0.89-1.00                                             | multi-scan, 0.82–1.00                                                                                                                                                       | multi-scan, 0.81–1.00                                             |
| $\theta$ range, deg                                                      | 2.5 – 30.0                                                        | 2.3 - 30.0                                                                                                                                                                  | 2.3 - 30.0                                                        |
| no. of rflns measd                                                       | 20454                                                             | 32468                                                                                                                                                                       | 34631                                                             |
| <i>R</i> <sub>int</sub>                                                  | 0.019                                                             | 0.036                                                                                                                                                                       | 0.041                                                             |
| no. of rflns unique                                                      | 7865                                                              | 11999                                                                                                                                                                       | 11263                                                             |
| no. of rflns <i>I</i> > 2 $\sigma$ ( <i>I</i> )                          | 7585                                                              | 10080                                                                                                                                                                       | 9028                                                              |
| no. of params / restraints                                               | 347 / 1                                                           | 488 / 0                                                                                                                                                                     | 460 / 0                                                           |
| <i>R</i> <sub>1</sub> ( <i>I</i> > 2 $\sigma$ ( <i>I</i> )) <sup>a</sup> | 0.0278                                                            | 0.0464                                                                                                                                                                      | 0.0361                                                            |
| <i>R</i> <sub>1</sub> (all data)                                         | 0.0290                                                            | 0.0593                                                                                                                                                                      | 0.0515                                                            |
| <i>wR</i> <sub>2</sub> ( <i>I</i> > 2 $\sigma$ ( <i>I</i> ))             | 0.0677                                                            | 0.0930                                                                                                                                                                      | 0.0732                                                            |
| <i>wR</i> <sub>2</sub> (all data)                                        | 0.0684                                                            | 0.0977                                                                                                                                                                      | 0.0783                                                            |
| Diff.Fourier.peak s min/max, eÅ <sup>-3</sup>                            | -0.34 / 1.27                                                      | -0.78 / 0.68                                                                                                                                                                | -0.39 / 0.50                                                      |

**Table S2.** Crystal data and structure refinement for compounds **8** and **9**.

|                                                                          | <b>8</b> (14-790)                                                                                                                                                                         | <b>9</b> (15-jcm2812a)                                                              |
|--------------------------------------------------------------------------|-------------------------------------------------------------------------------------------------------------------------------------------------------------------------------------------|-------------------------------------------------------------------------------------|
| formula                                                                  | C <sub>47</sub> H <sub>68</sub> BN <sub>6</sub> O <sub>12</sub> Rh<br>[C <sub>35</sub> H <sub>50</sub> BN <sub>6</sub> O <sub>8</sub> Rh·C <sub>12</sub> H <sub>18</sub> O <sub>4</sub> ] | C <sub>23</sub> H <sub>34</sub> BN <sub>6</sub> O <sub>5</sub> Rh·CHCl <sub>3</sub> |
| fw                                                                       | 1022.79                                                                                                                                                                                   | 707.66                                                                              |
| cryst.size, mm                                                           | 0.56 × 0.41 × 0.18                                                                                                                                                                        | 0.22 × 0.13 × 0.07                                                                  |
| crystal system                                                           | monoclinic                                                                                                                                                                                | triclinic                                                                           |
| space group                                                              | <i>P</i> 2 <sub>1</sub> / <i>c</i> (no. 14)                                                                                                                                               | <i>P</i> -1 (no. 2)                                                                 |
| <i>a</i> , Å                                                             | 11.4052(7)                                                                                                                                                                                | 9.6206(3)                                                                           |
| <i>b</i> , Å                                                             | 25.7392(16)                                                                                                                                                                               | 12.6144(4)                                                                          |
| <i>c</i> , Å                                                             | 19.1013(14)                                                                                                                                                                               | 13.4975(4)                                                                          |
| $\alpha$ , deg                                                           | 90                                                                                                                                                                                        | 80.049(1)°                                                                          |
| $\beta$ , deg                                                            | 107.309(2)                                                                                                                                                                                | 73.487(1)°                                                                          |
| $\gamma$ , deg                                                           | 90                                                                                                                                                                                        | 77.493(1)°                                                                          |
| <i>V</i> , Å <sup>3</sup>                                                | 5353.5(6)                                                                                                                                                                                 | 1522.33(8)                                                                          |
| <i>T</i> , K                                                             | 173                                                                                                                                                                                       | 100                                                                                 |
| <i>Z</i>                                                                 | 4                                                                                                                                                                                         | 2                                                                                   |
| $\rho_{\text{calc}}$ , g cm <sup>-3</sup>                                | 1.269                                                                                                                                                                                     | 1.544                                                                               |
| $\mu$ , mm <sup>-1</sup> (MoK $\alpha$ )                                 | 0.380                                                                                                                                                                                     | 0.87                                                                                |
| <i>F</i> (000)                                                           | 2152                                                                                                                                                                                      | 724                                                                                 |
| absorption corrections                                                   | multi-scan, 0.87-1.00                                                                                                                                                                     | multi-scan, 0.83-0.94                                                               |
| $\theta$ range, deg                                                      | 2.2 - 30.0                                                                                                                                                                                | 1.7 - 30.6                                                                          |
| no. of rflns measd                                                       | 89809                                                                                                                                                                                     | 18580                                                                               |
| <i>R</i> <sub>int</sub>                                                  | 0.046                                                                                                                                                                                     | 0.019                                                                               |
| no. of rflns unique                                                      | 15529                                                                                                                                                                                     | 9317                                                                                |
| no. of rflns <i>I</i> > 2 $\sigma$ ( <i>I</i> )                          | 12808                                                                                                                                                                                     | 8570                                                                                |
| no. of params / restraints                                               | 604 / 0                                                                                                                                                                                   | 377 / 2                                                                             |
| <i>R</i> <sub>1</sub> ( <i>I</i> > 2 $\sigma$ ( <i>I</i> )) <sup>a</sup> | 0.0456                                                                                                                                                                                    | 0.0267                                                                              |
| <i>R</i> <sub>1</sub> (all data)                                         | 0.0581                                                                                                                                                                                    | 0.0302                                                                              |
| <i>wR</i> <sub>2</sub> ( <i>I</i> > 2 $\sigma$ ( <i>I</i> ))             | 0.1058                                                                                                                                                                                    | 0.0656                                                                              |
| <i>wR</i> <sub>2</sub> (all data)                                        | 0.1125                                                                                                                                                                                    | 0.0676                                                                              |
| Diff.Fourier.peak s min/max, eÅ <sup>-3</sup>                            | -1.00 / 1.49                                                                                                                                                                              | -0.84 / 1.15                                                                        |

### Crystal structure of **3**

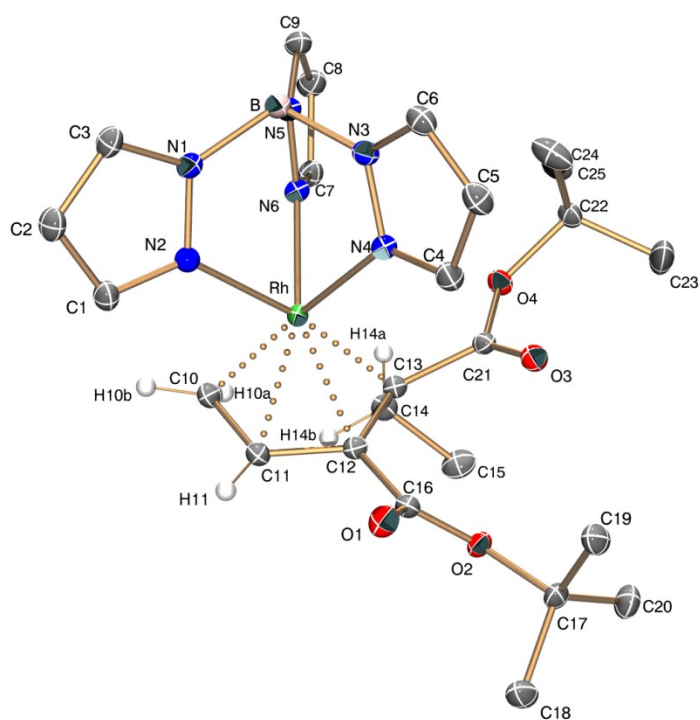

**Figure S1:** Structural diagram of the asymmetric unit of **3** showing 50% ellipsoids and the atom numbering. Most H-atoms omitted for clarity.

**Table S3:** Geometric data (Å, deg) of **3**.

#### Bond distances

|        |             |          |             |
|--------|-------------|----------|-------------|
| Rh—C10 | 2.0819 (15) | C12—C13  | 1.460 (2)   |
| Rh—N6  | 2.1007 (12) | C12—C16  | 1.507 (2)   |
| Rh—C11 | 2.1094 (14) | C13—C21  | 1.503 (2)   |
| Rh—C12 | 2.1103 (14) | C13—C14  | 1.529 (2)   |
| Rh—N2  | 2.1210 (13) | C14—C15  | 1.532 (2)   |
| Rh—C13 | 2.1287 (14) | C14—H14A | 0.9900      |
| Rh—N4  | 2.1817 (13) | C14—H14B | 0.9900      |
| B—N5   | 1.536 (2)   | C15—H15A | 0.9800      |
| B—N3   | 1.541 (2)   | C15—H15B | 0.9800      |
| B—N1   | 1.549 (2)   | C15—H15C | 0.9800      |
| B—H0B  | 1.0000      | C16—O1   | 1.2107 (18) |
| N1—C3  | 1.3514 (19) | C16—O2   | 1.3324 (17) |

|          |             |          |             |
|----------|-------------|----------|-------------|
| N1—N2    | 1.3641 (17) | O2—C17   | 1.4801 (17) |
| N2—C1    | 1.3357 (19) | C17—C18  | 1.516 (2)   |
| C1—C2    | 1.401 (2)   | C17—C20  | 1.521 (2)   |
| C1—H1    | 0.9500      | C17—C19  | 1.522 (2)   |
| C2—C3    | 1.378 (2)   | C18—H18A | 0.9800      |
| C2—H2    | 0.9500      | C18—H18B | 0.9800      |
| C3—H3    | 0.9500      | C18—H18C | 0.9800      |
| N3—C6    | 1.3491 (19) | C19—H19A | 0.9800      |
| N3—N4    | 1.3673 (17) | C19—H19B | 0.9800      |
| N4—C4    | 1.3325 (19) | C19—H19C | 0.9800      |
| C4—C5    | 1.399 (2)   | C20—H20A | 0.9800      |
| C4—H4    | 0.9500      | C20—H20B | 0.9800      |
| C5—C6    | 1.378 (2)   | C20—H20C | 0.9800      |
| C5—H5    | 0.9500      | C21—O3   | 1.2076 (18) |
| C6—H6    | 0.9500      | C21—O4   | 1.3514 (17) |
| N5—C9    | 1.3484 (19) | O4—C22   | 1.4698 (17) |
| N5—N6    | 1.3586 (17) | C22—C23  | 1.517 (2)   |
| N6—C7    | 1.3328 (19) | C22—C25  | 1.521 (2)   |
| C7—C8    | 1.398 (2)   | C22—C24  | 1.522 (2)   |
| C7—H7    | 0.9500      | C23—H23A | 0.9800      |
| C8—C9    | 1.382 (2)   | C23—H23B | 0.9800      |
| C8—H8    | 0.9500      | C23—H23C | 0.9800      |
| C9—H9    | 0.9500      | C24—H24A | 0.9800      |
| C10—C11  | 1.448 (2)   | C24—H24B | 0.9800      |
| C10—H10A | 0.9600      | C24—H24C | 0.9800      |
| C10—H10B | 0.9599      | C25—H25A | 0.9800      |
| C11—C12  | 1.423 (2)   | C25—H25B | 0.9800      |
| C11—H11  | 0.9600 (1)  | C25—H25C | 0.9800      |

#### Bond angles

|            |            |             |             |
|------------|------------|-------------|-------------|
| C10—Rh—N6  | 104.66 (5) | C10—C11—H11 | 120.9 (12)  |
| C10—Rh—C11 | 40.41 (6)  | Rh—C11—H11  | 124.8 (12)  |
| N6—Rh—C11  | 143.80 (5) | C11—C12—C13 | 116.22 (13) |
| C10—Rh—C12 | 72.37 (6)  | C11—C12—C16 | 117.73 (13) |
| N6—Rh—C12  | 141.20 (5) | C13—C12—C16 | 126.05 (13) |
| C11—Rh—C12 | 39.42 (5)  | C11—C12—Rh  | 70.26 (8)   |

|            |             |               |             |
|------------|-------------|---------------|-------------|
| C10—Rh—N2  | 92.49 (5)   | C13—C12—Rh    | 70.53 (8)   |
| N6—Rh—N2   | 86.26 (5)   | C16—C12—Rh    | 129.03 (10) |
| C11—Rh—N2  | 101.48 (5)  | C12—C13—C21   | 117.72 (12) |
| C12—Rh—N2  | 132.01 (5)  | C12—C13—C14   | 119.65 (12) |
| C10—Rh—C13 | 82.44 (6)   | C21—C13—C14   | 113.10 (12) |
| N6—Rh—C13  | 101.11 (5)  | C12—C13—Rh    | 69.17 (8)   |
| C11—Rh—C13 | 70.57 (6)   | C21—C13—Rh    | 104.78 (9)  |
| C12—Rh—C13 | 40.29 (5)   | C14—C13—Rh    | 125.40 (10) |
| N2—Rh—C13  | 171.89 (5)  | C13—C14—C15   | 110.02 (13) |
| C10—Rh—N4  | 166.42 (5)  | C13—C14—H14A  | 109.7       |
| N6—Rh—N4   | 86.97 (5)   | C15—C14—H14A  | 109.7       |
| C11—Rh—N4  | 129.01 (5)  | C13—C14—H14B  | 109.7       |
| C12—Rh—N4  | 103.04 (5)  | C15—C14—H14B  | 109.7       |
| N2—Rh—N4   | 81.13 (5)   | H14A—C14—H14B | 108.2       |
| C13—Rh—N4  | 102.46 (5)  | C14—C15—H15A  | 109.5       |
| N5—B—N3    | 109.23 (12) | C14—C15—H15B  | 109.5       |
| N5—B—N1    | 108.75 (12) | H15A—C15—H15B | 109.5       |
| N3—B—N1    | 106.80 (12) | C14—C15—H15C  | 109.5       |
| N5—B—H0B   | 110.7       | H15A—C15—H15C | 109.5       |
| N3—B—H0B   | 110.7       | H15B—C15—H15C | 109.5       |
| N1—B—H0B   | 110.7       | O1—C16—O2     | 126.37 (13) |
| C3—N1—N2   | 109.41 (12) | O1—C16—C12    | 124.69 (13) |
| C3—N1—B    | 130.04 (13) | O2—C16—C12    | 108.80 (12) |
| N2—N1—B    | 120.25 (12) | C16—O2—C17    | 122.05 (12) |
| C1—N2—N1   | 106.73 (12) | O2—C17—C18    | 109.30 (12) |
| C1—N2—Rh   | 134.01 (10) | O2—C17—C20    | 101.98 (12) |
| N1—N2—Rh   | 119.26 (9)  | C18—C17—C20   | 111.34 (13) |
| N2—C1—C2   | 110.54 (13) | O2—C17—C19    | 110.87 (12) |
| N2—C1—H1   | 124.7       | C18—C17—C19   | 111.93 (13) |
| C2—C1—H1   | 124.7       | C20—C17—C19   | 110.98 (13) |
| C3—C2—C1   | 104.48 (13) | C17—C18—H18A  | 109.5       |
| C3—C2—H2   | 127.8       | C17—C18—H18B  | 109.5       |
| C1—C2—H2   | 127.8       | H18A—C18—H18B | 109.5       |
| N1—C3—C2   | 108.84 (14) | C17—C18—H18C  | 109.5       |
| N1—C3—H3   | 125.6       | H18A—C18—H18C | 109.5       |
| C2—C3—H3   | 125.6       | H18B—C18—H18C | 109.5       |

|               |             |               |             |
|---------------|-------------|---------------|-------------|
| C6—N3—N4      | 109.66 (12) | C17—C19—H19A  | 109.5       |
| C6—N3—B       | 128.11 (13) | C17—C19—H19B  | 109.5       |
| N4—N3—B       | 120.34 (12) | H19A—C19—H19B | 109.5       |
| C4—N4—N3      | 106.50 (12) | C17—C19—H19C  | 109.5       |
| C4—N4—Rh      | 135.05 (10) | H19A—C19—H19C | 109.5       |
| N3—N4—Rh      | 117.76 (9)  | H19B—C19—H19C | 109.5       |
| N4—C4—C5      | 110.59 (13) | C17—C20—H20A  | 109.5       |
| N4—C4—H4      | 124.7       | C17—C20—H20B  | 109.5       |
| C5—C4—H4      | 124.7       | H20A—C20—H20B | 109.5       |
| C6—C5—C4      | 104.75 (13) | C17—C20—H20C  | 109.5       |
| C6—C5—H5      | 127.6       | H20A—C20—H20C | 109.5       |
| C4—C5—H5      | 127.6       | H20B—C20—H20C | 109.5       |
| N3—C6—C5      | 108.49 (13) | O3—C21—O4     | 124.44 (13) |
| N3—C6—H6      | 125.8       | O3—C21—C13    | 126.59 (13) |
| C5—C6—H6      | 125.8       | O4—C21—C13    | 108.93 (12) |
| C9—N5—N6      | 109.60 (12) | C21—O4—C22    | 121.39 (11) |
| C9—N5—B       | 131.20 (13) | O4—C22—C23    | 111.18 (13) |
| N6—N5—B       | 119.03 (12) | O4—C22—C25    | 102.16 (12) |
| C7—N6—N5      | 107.06 (12) | C23—C22—C25   | 110.67 (14) |
| C7—N6—Rh      | 131.47 (10) | O4—C22—C24    | 109.42 (12) |
| N5—N6—Rh      | 121.23 (9)  | C23—C22—C24   | 112.92 (16) |
| N6—C7—C8      | 110.21 (14) | C25—C22—C24   | 109.96 (14) |
| N6—C7—H7      | 124.9       | C22—C23—H23A  | 109.5       |
| C8—C7—H7      | 124.9       | C22—C23—H23B  | 109.5       |
| C9—C8—C7      | 104.76 (13) | H23A—C23—H23B | 109.5       |
| C9—C8—H8      | 127.6       | C22—C23—H23C  | 109.5       |
| C7—C8—H8      | 127.6       | H23A—C23—H23C | 109.5       |
| N5—C9—C8      | 108.37 (13) | H23B—C23—H23C | 109.5       |
| N5—C9—H9      | 125.8       | C22—C24—H24A  | 109.5       |
| C8—C9—H9      | 125.8       | C22—C24—H24B  | 109.5       |
| C11—C10—Rh    | 70.81 (8)   | H24A—C24—H24B | 109.5       |
| C11—C10—H10A  | 122.1       | C22—C24—H24C  | 109.5       |
| Rh—C10—H10A   | 111.8       | H24A—C24—H24C | 109.5       |
| C11—C10—H10B  | 116.2       | H24B—C24—H24C | 109.5       |
| Rh—C10—H10B   | 115.2       | C22—C25—H25A  | 109.5       |
| H10A—C10—H10B | 113.5       | C22—C25—H25B  | 109.5       |

|             |             |               |       |
|-------------|-------------|---------------|-------|
| C12—C11—C10 | 119.10 (13) | H25A—C25—H25B | 109.5 |
| C12—C11—Rh  | 70.32 (8)   | C22—C25—H25C  | 109.5 |
| C10—C11—Rh  | 68.77 (8)   | H25A—C25—H25C | 109.5 |
| C12—C11—H11 | 119.2 (12)  | H25B—C25—H25C | 109.5 |

### Crystal structure of **4**

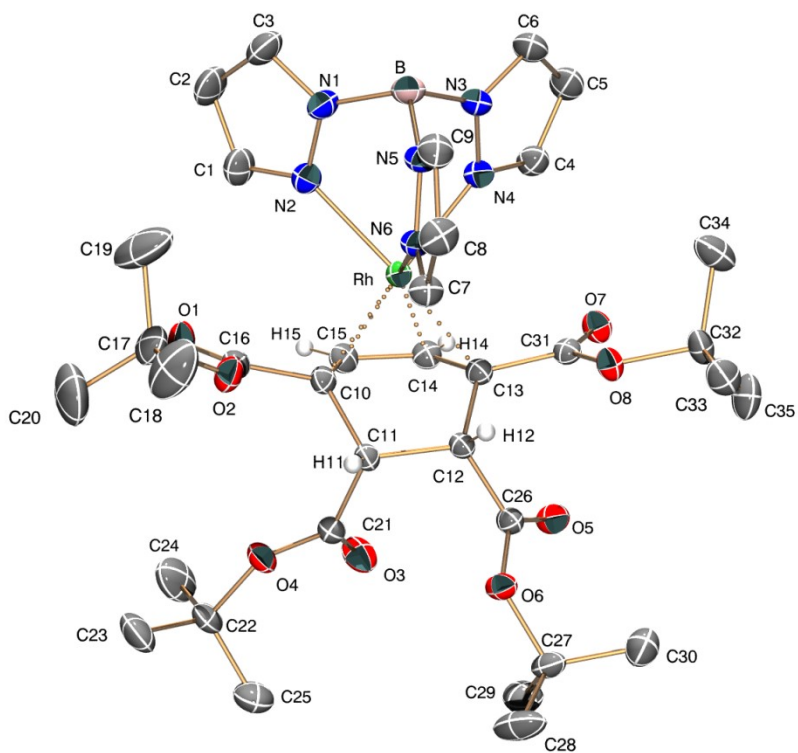

**Figure S2a:** Structural diagram of the asymmetric unit of **4** showing 50% ellipsoids and the atom numbering. Most H-atoms and the *n*-hexane solvent molecule were omitted for clarity.

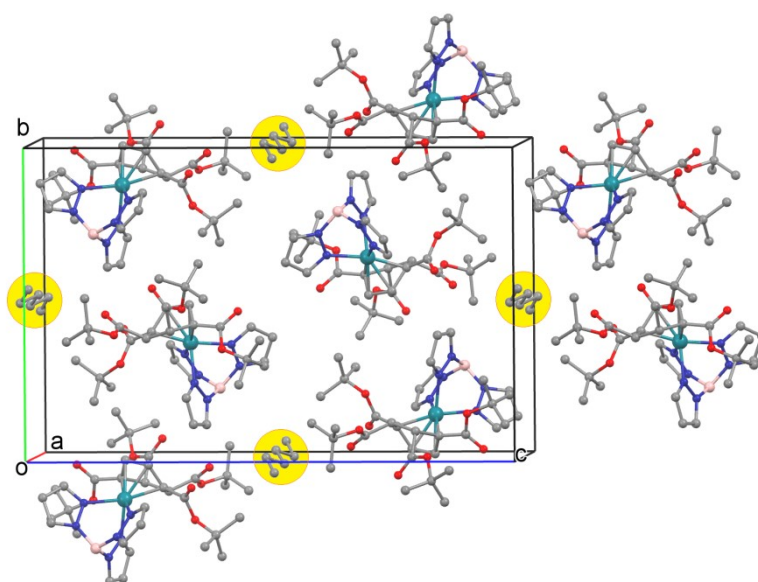

**Figure S2b:** Packing diagram of **4** viewed approximately down the *a*-axis showing the Rh-complexes and the highlighted *n*-hexane solvent molecules. H-atoms omitted for clarity.

**Table S4:** Geometric data (Å, deg) of **4**.

## Bond distances

|        |             |          |           |
|--------|-------------|----------|-----------|
| Rh—C15 | 2.102 (2)   | C19—H19C | 0.9800    |
| Rh—C10 | 2.106 (2)   | C20—H20A | 0.9800    |
| Rh—C13 | 2.106 (2)   | C20—H20B | 0.9800    |
| Rh—N6  | 2.1069 (18) | C20—H20C | 0.9800    |
| Rh—C14 | 2.114 (2)   | C21—O3   | 1.204 (3) |
| Rh—N4  | 2.1408 (19) | C21—O4   | 1.338 (3) |
| Rh—N2  | 2.1510 (19) | O4—C22   | 1.474 (3) |
| B—N5   | 1.532 (3)   | C22—C24  | 1.512 (4) |
| B—N3   | 1.534 (3)   | C22—C25  | 1.513 (4) |
| B—N1   | 1.549 (3)   | C22—C23  | 1.513 (4) |
| B—H0B  | 1.0000      | C23—H23A | 0.9800    |
| N1—C3  | 1.351 (3)   | C23—H23B | 0.9800    |
| N1—N2  | 1.361 (3)   | C23—H23C | 0.9800    |
| N2—C1  | 1.333 (3)   | C24—H24A | 0.9800    |
| C1—C2  | 1.394 (4)   | C24—H24B | 0.9800    |
| C1—H1  | 0.9500      | C24—H24C | 0.9800    |
| C2—C3  | 1.373 (4)   | C25—H25A | 0.9800    |
| C2—H2  | 0.9500      | C25—H25B | 0.9800    |
| C3—H3  | 0.9500      | C25—H25C | 0.9800    |
| N3—C6  | 1.353 (3)   | C26—O5   | 1.201 (3) |
| N3—N4  | 1.367 (3)   | C26—O6   | 1.343 (3) |
| N4—C4  | 1.336 (3)   | O6—C27   | 1.485 (3) |
| C4—C5  | 1.392 (4)   | C27—C29  | 1.514 (4) |
| C4—H4  | 0.9500      | C27—C28  | 1.516 (4) |
| C5—C6  | 1.369 (4)   | C27—C30  | 1.520 (4) |
| C5—H5  | 0.9500      | C28—H28A | 0.9800    |
| C6—H6  | 0.9500      | C28—H28B | 0.9800    |
| N5—C9  | 1.345 (3)   | C28—H28C | 0.9800    |
| N5—N6  | 1.359 (2)   | C29—H29A | 0.9800    |
| N6—C7  | 1.333 (3)   | C29—H29B | 0.9800    |
| C7—C8  | 1.389 (3)   | C29—H29C | 0.9800    |
| C7—H7  | 0.9500      | C30—H30A | 0.9800    |
| C8—C9  | 1.376 (4)   | C30—H30B | 0.9800    |
| C8—H8  | 0.9500      | C30—H30C | 0.9800    |

|          |           |                      |            |
|----------|-----------|----------------------|------------|
| C9—H9    | 0.9500    | C31—O7               | 1.203 (3)  |
| C10—C15  | 1.443 (3) | C31—O8               | 1.357 (3)  |
| C10—C16  | 1.497 (3) | O8—C32               | 1.474 (3)  |
| C10—C11  | 1.538 (3) | C32—C33              | 1.514 (3)  |
| C11—C21  | 1.521 (3) | C32—C35              | 1.517 (3)  |
| C11—C12  | 1.541 (3) | C32—C34              | 1.518 (3)  |
| C11—H11  | 1.0000    | C33—H33A             | 0.9800     |
| C12—C13  | 1.521 (3) | C33—H33B             | 0.9800     |
| C12—C26  | 1.527 (3) | C33—H33C             | 0.9800     |
| C12—H12  | 1.0000    | C34—H34A             | 0.9800     |
| C13—C14  | 1.447 (3) | C34—H34B             | 0.9800     |
| C13—C31  | 1.489 (3) | C34—H34C             | 0.9800     |
| C14—C15  | 1.409 (3) | C35—H35A             | 0.9800     |
| C14—H14  | 0.9500    | C35—H35B             | 0.9800     |
| C15—H15  | 0.9500    | C35—H35C             | 0.9800     |
| C16—O1   | 1.205 (3) | C1S—C1S <sup>i</sup> | 1.396 (13) |
| C16—O2   | 1.338 (3) | C1S—C2S              | 1.463 (9)  |
| O2—C17   | 1.471 (3) | C1S—H1SA             | 0.9900     |
| C17—C19  | 1.512 (4) | C1S—H1SB             | 0.9900     |
| C17—C20  | 1.512 (4) | C2S—C3S              | 1.233 (9)  |
| C17—C18  | 1.514 (4) | C2S—H2SA             | 0.9900     |
| C18—H18A | 0.9800    | C2S—H2SB             | 0.9900     |
| C18—H18B | 0.9800    | C3S—H3SA             | 0.9800     |
| C18—H18C | 0.9800    | C3S—H3SB             | 0.9800     |
| C19—H19A | 0.9800    | C3S—H3SC             | 0.9800     |
| C19—H19B | 0.9800    |                      |            |

#### Bond angles

|            |            |               |       |
|------------|------------|---------------|-------|
| C15—Rh—C10 | 40.12 (8)  | C17—C18—H18B  | 109.5 |
| C15—Rh—C13 | 69.39 (8)  | H18A—C18—H18B | 109.5 |
| C10—Rh—C13 | 75.70 (8)  | C17—C18—H18C  | 109.5 |
| C15—Rh—N6  | 142.50 (8) | H18A—C18—H18C | 109.5 |
| C10—Rh—N6  | 102.40 (8) | H18B—C18—H18C | 109.5 |
| C13—Rh—N6  | 106.54 (8) | C17—C19—H19A  | 109.5 |
| C15—Rh—C14 | 39.05 (9)  | C17—C19—H19B  | 109.5 |
| C10—Rh—C14 | 69.07 (9)  | H19A—C19—H19B | 109.5 |

|            |             |               |             |
|------------|-------------|---------------|-------------|
| C13—Rh—C14 | 40.10 (8)   | C17—C19—H19C  | 109.5       |
| N6—Rh—C14  | 146.20 (8)  | H19A—C19—H19C | 109.5       |
| C15—Rh—N4  | 130.12 (8)  | H19B—C19—H19C | 109.5       |
| C10—Rh—N4  | 169.93 (8)  | C17—C20—H20A  | 109.5       |
| C13—Rh—N4  | 99.02 (8)   | C17—C20—H20B  | 109.5       |
| N6—Rh—N4   | 87.27 (7)   | H20A—C20—H20B | 109.5       |
| C14—Rh—N4  | 101.32 (8)  | C17—C20—H20C  | 109.5       |
| C15—Rh—N2  | 100.36 (8)  | H20A—C20—H20C | 109.5       |
| C10—Rh—N2  | 100.72 (8)  | H20B—C20—H20C | 109.5       |
| C13—Rh—N2  | 167.99 (8)  | O3—C21—O4     | 126.0 (2)   |
| N6—Rh—N2   | 85.38 (7)   | O3—C21—C11    | 124.9 (2)   |
| C14—Rh—N2  | 127.89 (8)  | O4—C21—C11    | 109.04 (18) |
| N4—Rh—N2   | 82.68 (7)   | C21—O4—C22    | 122.17 (19) |
| N5—B—N3    | 108.58 (19) | O4—C22—C24    | 109.1 (2)   |
| N5—B—N1    | 109.3 (2)   | O4—C22—C25    | 110.5 (2)   |
| N3—B—N1    | 107.0 (2)   | C24—C22—C25   | 111.9 (3)   |
| N5—B—H0B   | 110.6       | O4—C22—C23    | 102.1 (2)   |
| N3—B—H0B   | 110.6       | C24—C22—C23   | 112.0 (2)   |
| N1—B—H0B   | 110.6       | C25—C22—C23   | 110.8 (2)   |
| C3—N1—N2   | 109.1 (2)   | C22—C23—H23A  | 109.5       |
| C3—N1—B    | 128.9 (2)   | C22—C23—H23B  | 109.5       |
| N2—N1—B    | 121.00 (18) | H23A—C23—H23B | 109.5       |
| C1—N2—N1   | 107.03 (19) | C22—C23—H23C  | 109.5       |
| C1—N2—Rh   | 134.20 (17) | H23A—C23—H23C | 109.5       |
| N1—N2—Rh   | 117.86 (14) | H23B—C23—H23C | 109.5       |
| N2—C1—C2   | 110.3 (2)   | C22—C24—H24A  | 109.5       |
| N2—C1—H1   | 124.9       | C22—C24—H24B  | 109.5       |
| C2—C1—H1   | 124.9       | H24A—C24—H24B | 109.5       |
| C3—C2—C1   | 104.8 (2)   | C22—C24—H24C  | 109.5       |
| C3—C2—H2   | 127.6       | H24A—C24—H24C | 109.5       |
| C1—C2—H2   | 127.6       | H24B—C24—H24C | 109.5       |
| N1—C3—C2   | 108.7 (2)   | C22—C25—H25A  | 109.5       |
| N1—C3—H3   | 125.6       | C22—C25—H25B  | 109.5       |
| C2—C3—H3   | 125.6       | H25A—C25—H25B | 109.5       |
| C6—N3—N4   | 109.3 (2)   | C22—C25—H25C  | 109.5       |
| C6—N3—B    | 130.1 (2)   | H25A—C25—H25C | 109.5       |

|             |             |               |             |
|-------------|-------------|---------------|-------------|
| N4—N3—B     | 120.05 (19) | H25B—C25—H25C | 109.5       |
| C4—N4—N3    | 106.26 (19) | O5—C26—O6     | 125.4 (2)   |
| C4—N4—Rh    | 135.03 (16) | O5—C26—C12    | 124.4 (2)   |
| N3—N4—Rh    | 118.68 (14) | O6—C26—C12    | 110.01 (18) |
| N4—C4—C5    | 110.8 (2)   | C26—O6—C27    | 119.99 (17) |
| N4—C4—H4    | 124.6       | O6—C27—C29    | 110.0 (2)   |
| C5—C4—H4    | 124.6       | O6—C27—C28    | 102.27 (18) |
| C6—C5—C4    | 104.9 (2)   | C29—C27—C28   | 110.9 (2)   |
| C6—C5—H5    | 127.6       | O6—C27—C30    | 108.76 (19) |
| C4—C5—H5    | 127.6       | C29—C27—C30   | 113.6 (2)   |
| N3—C6—C5    | 108.7 (2)   | C28—C27—C30   | 110.7 (2)   |
| N3—C6—H6    | 125.6       | C27—C28—H28A  | 109.5       |
| C5—C6—H6    | 125.6       | C27—C28—H28B  | 109.5       |
| C9—N5—N6    | 109.81 (19) | H28A—C28—H28B | 109.5       |
| C9—N5—B     | 130.8 (2)   | C27—C28—H28C  | 109.5       |
| N6—N5—B     | 119.40 (18) | H28A—C28—H28C | 109.5       |
| C7—N6—N5    | 106.39 (18) | H28B—C28—H28C | 109.5       |
| C7—N6—Rh    | 133.22 (15) | C27—C29—H29A  | 109.5       |
| N5—N6—Rh    | 120.38 (14) | C27—C29—H29B  | 109.5       |
| N6—C7—C8    | 110.6 (2)   | H29A—C29—H29B | 109.5       |
| N6—C7—H7    | 124.7       | C27—C29—H29C  | 109.5       |
| C8—C7—H7    | 124.7       | H29A—C29—H29C | 109.5       |
| C9—C8—C7    | 104.8 (2)   | H29B—C29—H29C | 109.5       |
| C9—C8—H8    | 127.6       | C27—C30—H30A  | 109.5       |
| C7—C8—H8    | 127.6       | C27—C30—H30B  | 109.5       |
| N5—C9—C8    | 108.3 (2)   | H30A—C30—H30B | 109.5       |
| N5—C9—H9    | 125.8       | C27—C30—H30C  | 109.5       |
| C8—C9—H9    | 125.8       | H30A—C30—H30C | 109.5       |
| C15—C10—C16 | 117.99 (19) | H30B—C30—H30C | 109.5       |
| C15—C10—C11 | 117.14 (18) | O7—C31—O8     | 124.6 (2)   |
| C16—C10—C11 | 116.31 (19) | O7—C31—C13    | 126.2 (2)   |
| C15—C10—Rh  | 69.77 (12)  | O8—C31—C13    | 109.18 (18) |
| C16—C10—Rh  | 113.66 (14) | C31—O8—C32    | 121.84 (17) |
| C11—C10—Rh  | 113.23 (13) | O8—C32—C33    | 101.57 (18) |
| C21—C11—C10 | 106.01 (17) | O8—C32—C35    | 110.36 (19) |
| C21—C11—C12 | 114.43 (17) | C33—C32—C35   | 110.8 (2)   |

|             |             |                            |           |
|-------------|-------------|----------------------------|-----------|
| C10—C11—C12 | 108.52 (17) | O8—C32—C34                 | 109.2 (2) |
| C21—C11—H11 | 109.2       | C33—C32—C34                | 111.3 (2) |
| C10—C11—H11 | 109.2       | C35—C32—C34                | 113.0 (2) |
| C12—C11—H11 | 109.2       | C32—C33—H33A               | 109.5     |
| C13—C12—C26 | 110.25 (17) | C32—C33—H33B               | 109.5     |
| C13—C12—C11 | 110.86 (17) | H33A—C33—H33B              | 109.5     |
| C26—C12—C11 | 116.59 (17) | C32—C33—H33C               | 109.5     |
| C13—C12—H12 | 106.1       | H33A—C33—H33C              | 109.5     |
| C26—C12—H12 | 106.1       | H33B—C33—H33C              | 109.5     |
| C11—C12—H12 | 106.1       | C32—C34—H34A               | 109.5     |
| C14—C13—C31 | 116.92 (19) | C32—C34—H34B               | 109.5     |
| C14—C13—C12 | 120.30 (19) | H34A—C34—H34B              | 109.5     |
| C31—C13—C12 | 114.80 (18) | C32—C34—H34C               | 109.5     |
| C14—C13—Rh  | 70.25 (12)  | H34A—C34—H34C              | 109.5     |
| C31—C13—Rh  | 117.09 (14) | H34B—C34—H34C              | 109.5     |
| C12—C13—Rh  | 109.48 (14) | C32—C35—H35A               | 109.5     |
| C15—C14—C13 | 114.0 (2)   | C32—C35—H35B               | 109.5     |
| C15—C14—Rh  | 69.99 (12)  | H35A—C35—H35B              | 109.5     |
| C13—C14—Rh  | 69.65 (12)  | C32—C35—H35C               | 109.5     |
| C15—C14—H14 | 123.0       | H35A—C35—H35C              | 109.5     |
| C13—C14—H14 | 123.0       | H35B—C35—H35C              | 109.5     |
| Rh—C14—H14  | 129.3       | C1S <sup>i</sup> —C1S—C2S  | 107.5 (5) |
| C14—C15—C10 | 114.03 (19) | C1S <sup>i</sup> —C1S—H1SA | 110.2     |
| C14—C15—Rh  | 70.96 (12)  | C2S—C1S—H1SA               | 110.2     |
| C10—C15—Rh  | 70.11 (12)  | C1S <sup>i</sup> —C1S—H1SB | 110.2     |
| C14—C15—H15 | 123.0       | C2S—C1S—H1SB               | 110.2     |
| C10—C15—H15 | 123.0       | H1SA—C1S—H1SB              | 108.5     |
| Rh—C15—H15  | 127.7       | C3S—C2S—C1S                | 103.7 (6) |
| O1—C16—O2   | 125.6 (2)   | C3S—C2S—H2SA               | 111.0     |
| O1—C16—C10  | 124.3 (2)   | C1S—C2S—H2SA               | 111.0     |
| O2—C16—C10  | 109.98 (18) | C3S—C2S—H2SB               | 111.0     |
| C16—O2—C17  | 122.65 (19) | C1S—C2S—H2SB               | 111.0     |
| O2—C17—C19  | 108.5 (2)   | H2SA—C2S—H2SB              | 109.0     |
| O2—C17—C20  | 111.1 (2)   | C2S—C3S—H3SA               | 109.5     |
| C19—C17—C20 | 113.4 (3)   | C2S—C3S—H3SB               | 109.5     |
| O2—C17—C18  | 102.4 (2)   | H3SA—C3S—H3SB              | 109.5     |

|              |           |               |       |
|--------------|-----------|---------------|-------|
| C19—C17—C18  | 110.6 (3) | C2S—C3S—H3SC  | 109.5 |
| C20—C17—C18  | 110.4 (3) | H3SA—C3S—H3SC | 109.5 |
| C17—C18—H18A | 109.5     | H3SB—C3S—H3SC | 109.5 |

### Crystal structure of **5**

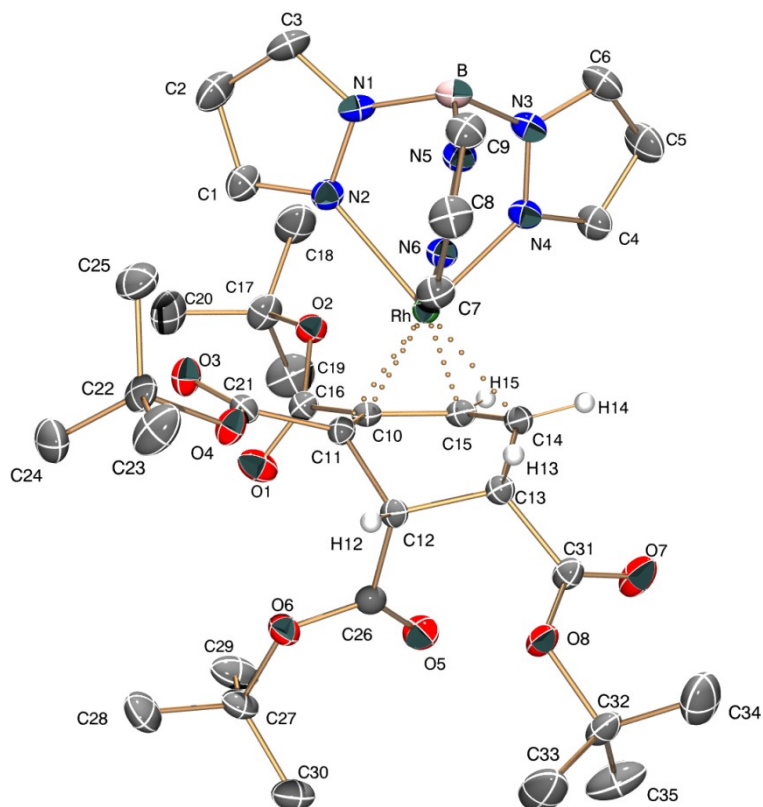

**Figure S3:** Structural diagram of the asymmetric unit of **5** showing 40% ellipsoids and the atom numbering. Most H-atoms omitted for clarity.

**Table S5:** Geometric data (Å, deg) of **5**.

#### Bond distances

|        |             |          |           |
|--------|-------------|----------|-----------|
| Rh—C14 | 2.0881 (17) | C18—H18A | 0.9800    |
| Rh—C10 | 2.0891 (17) | C18—H18B | 0.9800    |
| Rh—C15 | 2.1036 (17) | C18—H18C | 0.9800    |
| Rh—N4  | 2.1072 (16) | C19—H19A | 0.9800    |
| Rh—C11 | 2.1330 (18) | C19—H19B | 0.9800    |
| Rh—N6  | 2.1376 (15) | C19—H19C | 0.9800    |
| Rh—N2  | 2.1972 (15) | C20—H20A | 0.9800    |
| B—N1   | 1.524 (3)   | C20—H20B | 0.9800    |
| B—N5   | 1.538 (3)   | C20—H20C | 0.9800    |
| B—N3   | 1.543 (3)   | C21—O3   | 1.211 (2) |
| B—H0B  | 1.0000      | C21—O4   | 1.350 (2) |

|         |           |          |           |
|---------|-----------|----------|-----------|
| N1—C3   | 1.347 (2) | O4—C22   | 1.473 (2) |
| N1—N2   | 1.372 (2) | C22—C24  | 1.509 (3) |
| N2—C1   | 1.332 (2) | C22—C23  | 1.518 (3) |
| C1—C2   | 1.386 (3) | C22—C25  | 1.523 (3) |
| C1—H1   | 0.9500    | C23—H23A | 0.9800    |
| C2—C3   | 1.370 (3) | C23—H23B | 0.9800    |
| C2—H2   | 0.9500    | C23—H23C | 0.9800    |
| C3—H3   | 0.9500    | C24—H24A | 0.9800    |
| N3—C6   | 1.349 (3) | C24—H24B | 0.9800    |
| N3—N4   | 1.357 (2) | C24—H24C | 0.9800    |
| N4—C4   | 1.330 (2) | C25—H25A | 0.9800    |
| C4—C5   | 1.391 (3) | C25—H25B | 0.9800    |
| C4—H4   | 0.9500    | C25—H25C | 0.9800    |
| C5—C6   | 1.366 (3) | C26—O5   | 1.207 (2) |
| C5—H5   | 0.9500    | C26—O6   | 1.340 (2) |
| C6—H6   | 0.9500    | O6—C27   | 1.485 (2) |
| N5—C9   | 1.349 (2) | C27—C29  | 1.513 (3) |
| N5—N6   | 1.360 (2) | C27—C28  | 1.518 (3) |
| N6—C7   | 1.337 (2) | C27—C30  | 1.520 (3) |
| C7—C8   | 1.394 (3) | C28—H28A | 0.9800    |
| C7—H7   | 0.9500    | C28—H28B | 0.9800    |
| C8—C9   | 1.375 (3) | C28—H28C | 0.9800    |
| C8—H8   | 0.9500    | C29—H29A | 0.9800    |
| C9—H9   | 0.9500    | C29—H29B | 0.9800    |
| C10—C15 | 1.417 (3) | C29—H29C | 0.9800    |
| C10—C11 | 1.459 (2) | C30—H30A | 0.9800    |
| C10—C16 | 1.506 (2) | C30—H30B | 0.9800    |
| C11—C21 | 1.477 (2) | C30—H30C | 0.9800    |
| C11—C12 | 1.546 (2) | C31—O7   | 1.204 (2) |
| C12—C26 | 1.524 (2) | C31—O8   | 1.336 (2) |
| C12—C13 | 1.532 (2) | O8—C32   | 1.484 (2) |
| C12—H12 | 1.0000    | C32—C33  | 1.506 (3) |
| C13—C14 | 1.515 (2) | C32—C35  | 1.507 (3) |
| C13—C31 | 1.523 (2) | C32—C34  | 1.509 (3) |
| C13—H13 | 1.0000    | C33—H33A | 0.9800    |
| C14—C15 | 1.439 (2) | C33—H33B | 0.9800    |

|         |           |          |        |
|---------|-----------|----------|--------|
| C14—H14 | 1.0000    | C33—H33C | 0.9800 |
| C15—H15 | 1.0000    | C34—H34A | 0.9800 |
| C16—O1  | 1.200 (2) | C34—H34B | 0.9800 |
| C16—O2  | 1.332 (2) | C34—H34C | 0.9800 |
| O2—C17  | 1.485 (2) | C35—H35A | 0.9800 |
| C17—C20 | 1.514 (3) | C35—H35B | 0.9800 |
| C17—C19 | 1.518 (3) | C35—H35C | 0.9800 |
| C17—C18 | 1.519 (3) |          |        |

#### Bond angles

|            |             |               |             |
|------------|-------------|---------------|-------------|
| C14—Rh—C10 | 70.52 (7)   | O2—C16—C10    | 111.43 (15) |
| C14—Rh—C15 | 40.15 (7)   | C16—O2—C17    | 120.77 (15) |
| C10—Rh—C15 | 39.51 (7)   | O2—C17—C20    | 110.05 (16) |
| C14—Rh—N4  | 92.57 (7)   | O2—C17—C19    | 109.96 (16) |
| C10—Rh—N4  | 128.07 (7)  | C20—C17—C19   | 112.2 (2)   |
| C15—Rh—N4  | 97.05 (7)   | O2—C17—C18    | 101.67 (17) |
| C14—Rh—C11 | 75.82 (7)   | C20—C17—C18   | 111.06 (18) |
| C10—Rh—C11 | 40.42 (6)   | C19—C17—C18   | 111.40 (19) |
| C15—Rh—C11 | 68.78 (7)   | C17—C18—H18A  | 109.5       |
| N4—Rh—C11  | 165.77 (6)  | C17—C18—H18B  | 109.5       |
| C14—Rh—N6  | 106.77 (6)  | H18A—C18—H18B | 109.5       |
| C10—Rh—N6  | 143.71 (6)  | C17—C18—H18C  | 109.5       |
| C15—Rh—N6  | 146.52 (6)  | H18A—C18—H18C | 109.5       |
| N4—Rh—N6   | 87.77 (6)   | H18B—C18—H18C | 109.5       |
| C11—Rh—N6  | 103.30 (6)  | C17—C19—H19A  | 109.5       |
| C14—Rh—N2  | 171.69 (6)  | C17—C19—H19B  | 109.5       |
| C10—Rh—N2  | 104.52 (6)  | H19A—C19—H19B | 109.5       |
| C15—Rh—N2  | 132.09 (6)  | C17—C19—H19C  | 109.5       |
| N4—Rh—N2   | 85.36 (6)   | H19A—C19—H19C | 109.5       |
| C11—Rh—N2  | 104.94 (6)  | H19B—C19—H19C | 109.5       |
| N6—Rh—N2   | 81.22 (6)   | C17—C20—H20A  | 109.5       |
| N1—B—N5    | 107.56 (16) | C17—C20—H20B  | 109.5       |
| N1—B—N3    | 109.70 (16) | H20A—C20—H20B | 109.5       |
| N5—B—N3    | 108.87 (16) | C17—C20—H20C  | 109.5       |
| N1—B—H0B   | 110.2       | H20A—C20—H20C | 109.5       |
| N5—B—H0B   | 110.2       | H20B—C20—H20C | 109.5       |

|          |             |               |             |
|----------|-------------|---------------|-------------|
| N3—B—H0B | 110.2       | O3—C21—O4     | 124.63 (17) |
| C3—N1—N2 | 109.37 (16) | O3—C21—C11    | 125.07 (17) |
| C3—N1—B  | 129.24 (17) | O4—C21—C11    | 110.23 (15) |
| N2—N1—B  | 121.28 (15) | C21—O4—C22    | 121.37 (14) |
| C1—N2—N1 | 106.16 (15) | O4—C22—C24    | 111.15 (16) |
| C1—N2—Rh | 137.21 (13) | O4—C22—C23    | 101.96 (15) |
| N1—N2—Rh | 116.63 (12) | C24—C22—C23   | 110.75 (18) |
| N2—C1—C2 | 110.75 (19) | O4—C22—C25    | 108.90 (16) |
| N2—C1—H1 | 124.6       | C24—C22—C25   | 112.73 (18) |
| C2—C1—H1 | 124.6       | C23—C22—C25   | 110.82 (17) |
| C3—C2—C1 | 105.21 (18) | C22—C23—H23A  | 109.5       |
| C3—C2—H2 | 127.4       | C22—C23—H23B  | 109.5       |
| C1—C2—H2 | 127.4       | H23A—C23—H23B | 109.5       |
| N1—C3—C2 | 108.50 (18) | C22—C23—H23C  | 109.5       |
| N1—C3—H3 | 125.8       | H23A—C23—H23C | 109.5       |
| C2—C3—H3 | 125.8       | H23B—C23—H23C | 109.5       |
| C6—N3—N4 | 108.94 (16) | C22—C24—H24A  | 109.5       |
| C6—N3—B  | 131.24 (17) | C22—C24—H24B  | 109.5       |
| N4—N3—B  | 119.80 (16) | H24A—C24—H24B | 109.5       |
| C4—N4—N3 | 107.20 (16) | C22—C24—H24C  | 109.5       |
| C4—N4—Rh | 132.44 (13) | H24A—C24—H24C | 109.5       |
| N3—N4—Rh | 120.00 (12) | H24B—C24—H24C | 109.5       |
| N4—C4—C5 | 110.00 (18) | C22—C25—H25A  | 109.5       |
| N4—C4—H4 | 125.0       | C22—C25—H25B  | 109.5       |
| C5—C4—H4 | 125.0       | H25A—C25—H25B | 109.5       |
| C6—C5—C4 | 105.09 (19) | C22—C25—H25C  | 109.5       |
| C6—C5—H5 | 127.5       | H25A—C25—H25C | 109.5       |
| C4—C5—H5 | 127.5       | H25B—C25—H25C | 109.5       |
| N3—C6—C5 | 108.77 (18) | O5—C26—O6     | 125.99 (17) |
| N3—C6—H6 | 125.6       | O5—C26—C12    | 124.81 (17) |
| C5—C6—H6 | 125.6       | O6—C26—C12    | 109.17 (15) |
| C9—N5—N6 | 109.57 (15) | C26—O6—C27    | 121.46 (15) |
| C9—N5—B  | 130.88 (16) | O6—C27—C29    | 109.66 (16) |
| N6—N5—B  | 118.76 (14) | O6—C27—C28    | 102.03 (16) |
| C7—N6—N5 | 106.39 (14) | C29—C27—C28   | 110.96 (19) |
| C7—N6—Rh | 133.52 (13) | O6—C27—C30    | 109.88 (16) |

|             |             |               |             |
|-------------|-------------|---------------|-------------|
| N5—N6—Rh    | 120.06 (11) | C29—C27—C30   | 112.87 (18) |
| N6—C7—C8    | 110.74 (17) | C28—C27—C30   | 110.91 (18) |
| N6—C7—H7    | 124.6       | C27—C28—H28A  | 109.5       |
| C8—C7—H7    | 124.6       | C27—C28—H28B  | 109.5       |
| C9—C8—C7    | 104.53 (17) | H28A—C28—H28B | 109.5       |
| C9—C8—H8    | 127.7       | C27—C28—H28C  | 109.5       |
| C7—C8—H8    | 127.7       | H28A—C28—H28C | 109.5       |
| N5—C9—C8    | 108.76 (17) | H28B—C28—H28C | 109.5       |
| N5—C9—H9    | 125.6       | C27—C29—H29A  | 109.5       |
| C8—C9—H9    | 125.6       | C27—C29—H29B  | 109.5       |
| C15—C10—C11 | 112.60 (15) | H29A—C29—H29B | 109.5       |
| C15—C10—C16 | 120.84 (16) | C27—C29—H29C  | 109.5       |
| C11—C10—C16 | 126.38 (16) | H29A—C29—H29C | 109.5       |
| C15—C10—Rh  | 70.80 (10)  | H29B—C29—H29C | 109.5       |
| C11—C10—Rh  | 71.41 (10)  | C27—C30—H30A  | 109.5       |
| C16—C10—Rh  | 129.64 (12) | C27—C30—H30B  | 109.5       |
| C10—C11—C21 | 118.51 (15) | H30A—C30—H30B | 109.5       |
| C10—C11—C12 | 115.80 (15) | C27—C30—H30C  | 109.5       |
| C21—C11—C12 | 118.46 (15) | H30A—C30—H30C | 109.5       |
| C10—C11—Rh  | 68.17 (10)  | H30B—C30—H30C | 109.5       |
| C21—C11—Rh  | 112.80 (12) | O7—C31—O8     | 125.44 (17) |
| C12—C11—Rh  | 112.40 (11) | O7—C31—C13    | 124.26 (17) |
| C26—C12—C13 | 113.18 (14) | O8—C31—C13    | 110.01 (15) |
| C26—C12—C11 | 106.98 (14) | C31—O8—C32    | 121.21 (14) |
| C13—C12—C11 | 108.30 (14) | O8—C32—C33    | 102.66 (15) |
| C26—C12—H12 | 109.4       | O8—C32—C35    | 110.43 (16) |
| C13—C12—H12 | 109.4       | C33—C32—C35   | 111.0 (2)   |
| C11—C12—H12 | 109.4       | O8—C32—C34    | 108.73 (17) |
| C14—C13—C31 | 113.75 (15) | C33—C32—C34   | 109.84 (19) |
| C14—C13—C12 | 109.63 (14) | C35—C32—C34   | 113.6 (2)   |
| C31—C13—C12 | 116.46 (15) | C32—C33—H33A  | 109.5       |
| C14—C13—H13 | 105.3       | C32—C33—H33B  | 109.5       |
| C31—C13—H13 | 105.3       | H33A—C33—H33B | 109.5       |
| C12—C13—H13 | 105.3       | C32—C33—H33C  | 109.5       |
| C15—C14—C13 | 122.77 (16) | H33A—C33—H33C | 109.5       |
| C15—C14—Rh  | 70.51 (10)  | H33B—C33—H33C | 109.5       |

|             |             |               |       |
|-------------|-------------|---------------|-------|
| C13—C14—Rh  | 107.00 (11) | C32—C34—H34A  | 109.5 |
| C15—C14—H14 | 115.7       | C32—C34—H34B  | 109.5 |
| C13—C14—H14 | 115.7       | H34A—C34—H34B | 109.5 |
| Rh—C14—H14  | 115.7       | C32—C34—H34C  | 109.5 |
| C10—C15—C14 | 115.20 (16) | H34A—C34—H34C | 109.5 |
| C10—C15—Rh  | 69.69 (10)  | H34B—C34—H34C | 109.5 |
| C14—C15—Rh  | 69.34 (10)  | C32—C35—H35A  | 109.5 |
| C10—C15—H15 | 122.0       | C32—C35—H35B  | 109.5 |
| C14—C15—H15 | 122.0       | H35A—C35—H35B | 109.5 |
| Rh—C15—H15  | 122.0       | C32—C35—H35C  | 109.5 |
| O1—C16—O2   | 126.48 (17) | H35A—C35—H35C | 109.5 |
| O1—C16—C10  | 122.00 (16) | H35B—C35—H35C | 109.5 |

## Crystal structure of **8**

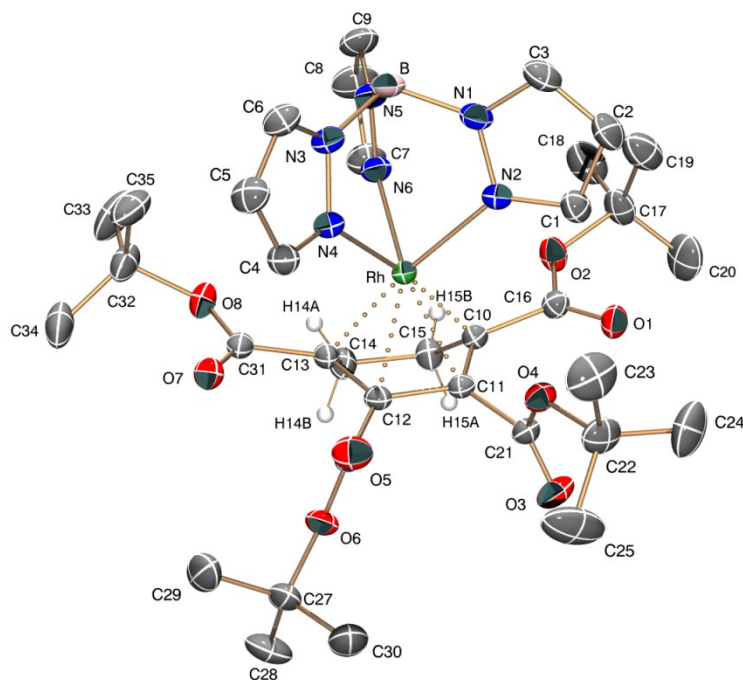

**Figure S4a:** Structural diagram of the asymmetric unit of **8** showing 50% ellipsoids and the atom numbering. Most H-atoms and the cocrystallized molecule of di-*tert*-butyl acetylenedicarboxylate (DTBAD) were omitted for clarity.

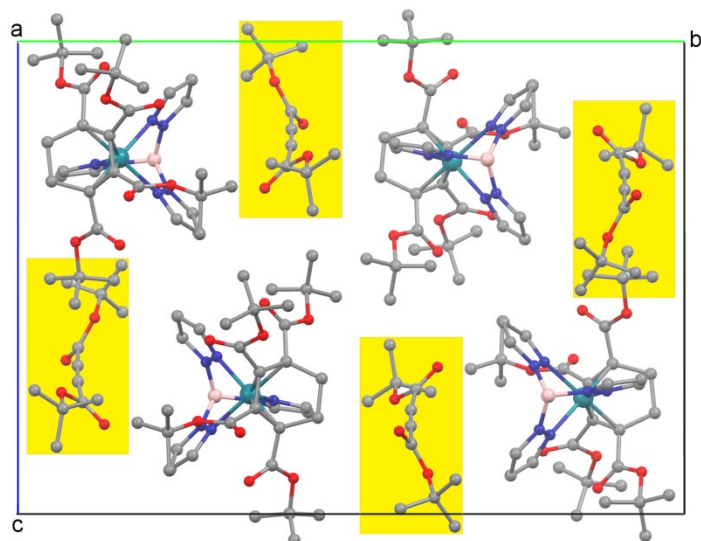

**Figure S4b:** Packing diagram of **8** in a view down the *a*-axis showing the disposition of the highlighted di-*tert*-butyl acetylenedicarboxylate (DTBAD) molecules between the Rh-complexes. H-atoms were omitted for clarity.

**Table S6:** Selected geometric data (Å, deg) of **8**.

## Bond distances

|        |             |          |           |
|--------|-------------|----------|-----------|
| Rh—C13 | 2.1035 (18) | C20—H20B | 0.9800    |
| Rh—C10 | 2.1126 (18) | C20—H20C | 0.9800    |
| Rh—C11 | 2.1159 (18) | C22—C24  | 1.499 (4) |
| Rh—N6  | 2.1163 (16) | C22—C25  | 1.509 (4) |
| Rh—C12 | 2.1170 (18) | C22—C23  | 1.512 (4) |
| Rh—N4  | 2.1341 (16) | C23—H23A | 0.9800    |
| Rh—N2  | 2.1661 (16) | C23—H23B | 0.9800    |
| O1—C16 | 1.210 (2)   | C23—H23C | 0.9800    |
| O2—C16 | 1.337 (2)   | C24—H24A | 0.9800    |
| O2—C17 | 1.470 (2)   | C24—H24B | 0.9800    |
| O3—C21 | 1.204 (2)   | C24—H24C | 0.9800    |
| O4—C21 | 1.325 (2)   | C25—H25A | 0.9800    |
| O4—C22 | 1.492 (2)   | C25—H25B | 0.9800    |
| O5—C26 | 1.192 (3)   | C25—H25C | 0.9800    |
| O6—C26 | 1.337 (2)   | C27—C29  | 1.518 (3) |
| O6—C27 | 1.479 (2)   | C27—C30  | 1.520 (4) |
| O7—C31 | 1.206 (2)   | C27—C28  | 1.524 (4) |
| O8—C31 | 1.343 (2)   | C28—H28A | 0.9800    |
| O8—C32 | 1.481 (3)   | C28—H28B | 0.9800    |
| N1—C3  | 1.344 (3)   | C28—H28C | 0.9800    |
| N1—N2  | 1.365 (2)   | C29—H29A | 0.9800    |
| N1—B   | 1.536 (3)   | C29—H29B | 0.9800    |
| N2—C1  | 1.336 (3)   | C29—H29C | 0.9800    |
| N3—C6  | 1.347 (3)   | C30—H30A | 0.9800    |
| N3—N4  | 1.369 (2)   | C30—H30B | 0.9800    |
| N3—B   | 1.537 (3)   | C30—H30C | 0.9800    |
| N4—C4  | 1.331 (3)   | C32—C33  | 1.513 (4) |
| N5—C9  | 1.347 (3)   | C32—C35  | 1.513 (3) |
| N5—N6  | 1.355 (2)   | C32—C34  | 1.522 (4) |
| N5—B   | 1.536 (3)   | C33—H33A | 0.9800    |
| N6—C7  | 1.329 (3)   | C33—H33B | 0.9800    |
| B—H0B  | 1.0000      | C33—H33C | 0.9800    |
| C1—C2  | 1.397 (3)   | C34—H34A | 0.9800    |
| C1—H1  | 0.9500      | C34—H34B | 0.9800    |

|          |           |          |           |
|----------|-----------|----------|-----------|
| C2—C3    | 1.374 (3) | C34—H34C | 0.9800    |
| C2—H2    | 0.9500    | C35—H35A | 0.9800    |
| C3—H3    | 0.9500    | C35—H35B | 0.9800    |
| C4—C5    | 1.399 (3) | C35—H35C | 0.9800    |
| C4—H4    | 0.9500    | O9—C38   | 1.203 (3) |
| C5—C6    | 1.375 (3) | O10—C38  | 1.316 (3) |
| C5—H5    | 0.9500    | O10—C39  | 1.489 (3) |
| C6—H6    | 0.9500    | O11—C43  | 1.195 (5) |
| C7—C8    | 1.395 (3) | O12—C43  | 1.324 (5) |
| C7—H7    | 0.9500    | O12—C44  | 1.490 (4) |
| C8—C9    | 1.371 (4) | C36—C37  | 1.188 (4) |
| C8—H8    | 0.9500    | C36—C38  | 1.462 (4) |
| C9—H9    | 0.9500    | C37—C43  | 1.472 (4) |
| C10—C11  | 1.450 (3) | C39—C42  | 1.495 (5) |
| C10—C16  | 1.488 (3) | C39—C40  | 1.497 (4) |
| C10—C15  | 1.525 (3) | C39—C41  | 1.521 (5) |
| C11—C12  | 1.418 (3) | C40—H40A | 0.9800    |
| C11—C21  | 1.510 (3) | C40—H40B | 0.9800    |
| C12—C13  | 1.449 (3) | C40—H40C | 0.9800    |
| C12—C26  | 1.512 (3) | C41—H41A | 0.9800    |
| C13—C31  | 1.498 (3) | C41—H41B | 0.9800    |
| C13—C14  | 1.520 (3) | C41—H41C | 0.9800    |
| C14—C15  | 1.531 (3) | C42—H42A | 0.9800    |
| C14—H14A | 0.9900    | C42—H42B | 0.9800    |
| C14—H14B | 0.9900    | C42—H42C | 0.9800    |
| C15—H15A | 0.9900    | C44—C47  | 1.480 (5) |
| C15—H15B | 0.9900    | C44—C46  | 1.492 (8) |
| C17—C20  | 1.509 (4) | C44—C45  | 1.524 (9) |
| C17—C19  | 1.516 (4) | C45—H45A | 0.9800    |
| C17—C18  | 1.522 (3) | C45—H45B | 0.9800    |
| C18—H18A | 0.9800    | C45—H45C | 0.9800    |
| C18—H18B | 0.9800    | C46—H46A | 0.9800    |
| C18—H18C | 0.9800    | C46—H46B | 0.9800    |
| C19—H19A | 0.9800    | C46—H46C | 0.9800    |
| C19—H19B | 0.9800    | C47—H47A | 0.9800    |
| C19—H19C | 0.9800    | C47—H47B | 0.9800    |

|          |        |          |        |
|----------|--------|----------|--------|
| C20—H20A | 0.9800 | C47—H47C | 0.9800 |
|----------|--------|----------|--------|

Bond angles

|            |             |               |             |
|------------|-------------|---------------|-------------|
| C13—Rh—C10 | 75.49 (7)   | O3—C21—O4     | 127.33 (18) |
| C13—Rh—C11 | 69.59 (7)   | O3—C21—C11    | 120.66 (18) |
| C10—Rh—C11 | 40.10 (7)   | O4—C21—C11    | 111.89 (15) |
| C13—Rh—N6  | 101.21 (7)  | O4—C22—C24    | 109.3 (2)   |
| C10—Rh—N6  | 102.38 (7)  | O4—C22—C25    | 109.4 (2)   |
| C11—Rh—N6  | 142.15 (7)  | C24—C22—C25   | 114.5 (3)   |
| C13—Rh—C12 | 40.15 (7)   | O4—C22—C23    | 101.65 (18) |
| C10—Rh—C12 | 68.88 (7)   | C24—C22—C23   | 110.7 (2)   |
| C11—Rh—C12 | 39.15 (7)   | C25—C22—C23   | 110.5 (2)   |
| N6—Rh—C12  | 141.09 (7)  | C22—C23—H23A  | 109.5       |
| C13—Rh—N4  | 100.89 (7)  | C22—C23—H23B  | 109.5       |
| C10—Rh—N4  | 169.66 (7)  | H23A—C23—H23B | 109.5       |
| C11—Rh—N4  | 129.59 (7)  | C22—C23—H23C  | 109.5       |
| N6—Rh—N4   | 87.78 (6)   | H23A—C23—H23C | 109.5       |
| C12—Rh—N4  | 102.00 (7)  | H23B—C23—H23C | 109.5       |
| C13—Rh—N2  | 173.08 (7)  | C22—C24—H24A  | 109.5       |
| C10—Rh—N2  | 100.51 (7)  | C22—C24—H24B  | 109.5       |
| C11—Rh—N2  | 103.68 (7)  | H24A—C24—H24B | 109.5       |
| N6—Rh—N2   | 85.09 (6)   | C22—C24—H24C  | 109.5       |
| C12—Rh—N2  | 133.26 (7)  | H24A—C24—H24C | 109.5       |
| N4—Rh—N2   | 82.07 (6)   | H24B—C24—H24C | 109.5       |
| C16—O2—C17 | 122.39 (16) | C22—C25—H25A  | 109.5       |
| C21—O4—C22 | 122.11 (16) | C22—C25—H25B  | 109.5       |
| C26—O6—C27 | 121.57 (17) | H25A—C25—H25B | 109.5       |
| C31—O8—C32 | 121.34 (17) | C22—C25—H25C  | 109.5       |
| C3—N1—N2   | 109.46 (18) | H25A—C25—H25C | 109.5       |
| C3—N1—B    | 129.07 (18) | H25B—C25—H25C | 109.5       |
| N2—N1—B    | 121.23 (16) | O5—C26—O6     | 127.16 (19) |
| C1—N2—N1   | 106.75 (16) | O5—C26—C12    | 127.39 (18) |
| C1—N2—Rh   | 135.97 (14) | O6—C26—C12    | 105.32 (17) |
| N1—N2—Rh   | 117.27 (12) | O6—C27—C29    | 108.80 (18) |
| C6—N3—N4   | 109.14 (17) | O6—C27—C30    | 109.86 (19) |
| C6—N3—B    | 128.92 (18) | C29—C27—C30   | 113.2 (2)   |

|          |             |               |             |
|----------|-------------|---------------|-------------|
| N4—N3—B  | 120.28 (16) | O6—C27—C28    | 101.7 (2)   |
| C4—N4—N3 | 106.65 (16) | C29—C27—C28   | 112.0 (2)   |
| C4—N4—Rh | 134.35 (13) | C30—C27—C28   | 110.7 (2)   |
| N3—N4—Rh | 118.55 (12) | C27—C28—H28A  | 109.5       |
| C9—N5—N6 | 109.83 (18) | C27—C28—H28B  | 109.5       |
| C9—N5—B  | 130.92 (18) | H28A—C28—H28B | 109.5       |
| N6—N5—B  | 118.81 (16) | C27—C28—H28C  | 109.5       |
| C7—N6—N5 | 106.66 (17) | H28A—C28—H28C | 109.5       |
| C7—N6—Rh | 132.33 (15) | H28B—C28—H28C | 109.5       |
| N5—N6—Rh | 120.86 (13) | C27—C29—H29A  | 109.5       |
| N5—B—N1  | 107.81 (17) | C27—C29—H29B  | 109.5       |
| N5—B—N3  | 110.22 (17) | H29A—C29—H29B | 109.5       |
| N1—B—N3  | 107.36 (16) | C27—C29—H29C  | 109.5       |
| N5—B—H0B | 110.5       | H29A—C29—H29C | 109.5       |
| N1—B—H0B | 110.5       | H29B—C29—H29C | 109.5       |
| N3—B—H0B | 110.5       | C27—C30—H30A  | 109.5       |
| N2—C1—C2 | 110.08 (19) | C27—C30—H30B  | 109.5       |
| N2—C1—H1 | 125.0       | H30A—C30—H30B | 109.5       |
| C2—C1—H1 | 125.0       | C27—C30—H30C  | 109.5       |
| C3—C2—C1 | 105.00 (19) | H30A—C30—H30C | 109.5       |
| C3—C2—H2 | 127.5       | H30B—C30—H30C | 109.5       |
| C1—C2—H2 | 127.5       | O7—C31—O8     | 125.00 (18) |
| N1—C3—C2 | 108.71 (19) | O7—C31—C13    | 124.48 (18) |
| N1—C3—H3 | 125.6       | O8—C31—C13    | 110.51 (17) |
| C2—C3—H3 | 125.6       | O8—C32—C33    | 101.80 (19) |
| N4—C4—C5 | 110.69 (18) | O8—C32—C35    | 109.24 (18) |
| N4—C4—H4 | 124.7       | C33—C32—C35   | 111.1 (2)   |
| C5—C4—H4 | 124.7       | O8—C32—C34    | 111.01 (19) |
| C6—C5—C4 | 104.38 (19) | C33—C32—C34   | 111.7 (2)   |
| C6—C5—H5 | 127.8       | C35—C32—C34   | 111.5 (2)   |
| C4—C5—H5 | 127.8       | C32—C33—H33A  | 109.5       |
| N3—C6—C5 | 109.13 (19) | C32—C33—H33B  | 109.5       |
| N3—C6—H6 | 125.4       | H33A—C33—H33B | 109.5       |
| C5—C6—H6 | 125.4       | C32—C33—H33C  | 109.5       |
| N6—C7—C8 | 110.3 (2)   | H33A—C33—H33C | 109.5       |
| N6—C7—H7 | 124.8       | H33B—C33—H33C | 109.5       |

|              |             |               |           |
|--------------|-------------|---------------|-----------|
| C8—C7—H7     | 124.8       | C32—C34—H34A  | 109.5     |
| C9—C8—C7     | 104.9 (2)   | C32—C34—H34B  | 109.5     |
| C9—C8—H8     | 127.5       | H34A—C34—H34B | 109.5     |
| C7—C8—H8     | 127.5       | C32—C34—H34C  | 109.5     |
| N5—C9—C8     | 108.2 (2)   | H34A—C34—H34C | 109.5     |
| N5—C9—H9     | 125.9       | H34B—C34—H34C | 109.5     |
| C8—C9—H9     | 125.9       | C32—C35—H35A  | 109.5     |
| C11—C10—C16  | 117.35 (16) | C32—C35—H35B  | 109.5     |
| C11—C10—C15  | 118.14 (16) | H35A—C35—H35B | 109.5     |
| C16—C10—C15  | 116.26 (16) | C32—C35—H35C  | 109.5     |
| C11—C10—Rh   | 70.08 (10)  | H35A—C35—H35C | 109.5     |
| C16—C10—Rh   | 114.45 (12) | H35B—C35—H35C | 109.5     |
| C15—C10—Rh   | 111.81 (12) | C38—O10—C39   | 120.6 (2) |
| C12—C11—C10  | 113.05 (16) | C43—O12—C44   | 122.1 (3) |
| C12—C11—C21  | 120.38 (17) | C37—C36—C38   | 172.8 (3) |
| C10—C11—C21  | 126.33 (17) | C36—C37—C43   | 176.5 (3) |
| C12—C11—Rh   | 70.47 (10)  | O9—C38—O10    | 127.6 (3) |
| C10—C11—Rh   | 69.83 (10)  | O9—C38—C36    | 121.0 (2) |
| C21—C11—Rh   | 132.48 (13) | O10—C38—C36   | 111.4 (2) |
| C11—C12—C13  | 114.24 (16) | O10—C39—C42   | 109.8 (3) |
| C11—C12—C26  | 120.98 (17) | O10—C39—C40   | 102.8 (2) |
| C13—C12—C26  | 124.48 (16) | C42—C39—C40   | 112.7 (3) |
| C11—C12—Rh   | 70.38 (10)  | O10—C39—C41   | 108.8 (3) |
| C13—C12—Rh   | 69.42 (10)  | C42—C39—C41   | 113.3 (3) |
| C26—C12—Rh   | 134.35 (13) | C40—C39—C41   | 108.9 (3) |
| C12—C13—C31  | 116.21 (16) | C39—C40—H40A  | 109.5     |
| C12—C13—C14  | 118.75 (16) | C39—C40—H40B  | 109.5     |
| C31—C13—C14  | 117.37 (16) | H40A—C40—H40B | 109.5     |
| C12—C13—Rh   | 70.43 (10)  | C39—C40—H40C  | 109.5     |
| C31—C13—Rh   | 112.97 (12) | H40A—C40—H40C | 109.5     |
| C14—C13—Rh   | 111.70 (12) | H40B—C40—H40C | 109.5     |
| C13—C14—C15  | 109.85 (15) | C39—C41—H41A  | 109.5     |
| C13—C14—H14A | 109.7       | C39—C41—H41B  | 109.5     |
| C15—C14—H14A | 109.7       | H41A—C41—H41B | 109.5     |
| C13—C14—H14B | 109.7       | C39—C41—H41C  | 109.5     |
| C15—C14—H14B | 109.7       | H41A—C41—H41C | 109.5     |

|               |             |               |           |
|---------------|-------------|---------------|-----------|
| H14A—C14—H14B | 108.2       | H41B—C41—H41C | 109.5     |
| C10—C15—C14   | 110.47 (16) | C39—C42—H42A  | 109.5     |
| C10—C15—H15A  | 109.6       | C39—C42—H42B  | 109.5     |
| C14—C15—H15A  | 109.6       | H42A—C42—H42B | 109.5     |
| C10—C15—H15B  | 109.6       | C39—C42—H42C  | 109.5     |
| C14—C15—H15B  | 109.6       | H42A—C42—H42C | 109.5     |
| H15A—C15—H15B | 108.1       | H42B—C42—H42C | 109.5     |
| O1—C16—O2     | 125.48 (18) | O11—C43—O12   | 128.8 (3) |
| O1—C16—C10    | 124.97 (18) | O11—C43—C37   | 122.1 (4) |
| O2—C16—C10    | 109.54 (16) | O12—C43—C37   | 109.0 (3) |
| O2—C17—C20    | 110.4 (2)   | C47—C44—O12   | 110.0 (3) |
| O2—C17—C19    | 109.65 (19) | C47—C44—C46   | 111.5 (5) |
| C20—C17—C19   | 113.1 (2)   | O12—C44—C46   | 109.4 (4) |
| O2—C17—C18    | 101.84 (18) | C47—C44—C45   | 110.7 (4) |
| C20—C17—C18   | 111.4 (2)   | O12—C44—C45   | 101.3 (4) |
| C19—C17—C18   | 109.9 (2)   | C46—C44—C45   | 113.5 (6) |
| C17—C18—H18A  | 109.5       | C44—C45—H45A  | 109.5     |
| C17—C18—H18B  | 109.5       | C44—C45—H45B  | 109.5     |
| H18A—C18—H18B | 109.5       | H45A—C45—H45B | 109.5     |
| C17—C18—H18C  | 109.5       | C44—C45—H45C  | 109.5     |
| H18A—C18—H18C | 109.5       | H45A—C45—H45C | 109.5     |
| H18B—C18—H18C | 109.5       | H45B—C45—H45C | 109.5     |
| C17—C19—H19A  | 109.5       | C44—C46—H46A  | 109.5     |
| C17—C19—H19B  | 109.5       | C44—C46—H46B  | 109.5     |
| H19A—C19—H19B | 109.5       | H46A—C46—H46B | 109.5     |
| C17—C19—H19C  | 109.5       | C44—C46—H46C  | 109.5     |
| H19A—C19—H19C | 109.5       | H46A—C46—H46C | 109.5     |
| H19B—C19—H19C | 109.5       | H46B—C46—H46C | 109.5     |
| C17—C20—H20A  | 109.5       | C44—C47—H47A  | 109.5     |
| C17—C20—H20B  | 109.5       | C44—C47—H47B  | 109.5     |
| H20A—C20—H20B | 109.5       | H47A—C47—H47B | 109.5     |
| C17—C20—H20C  | 109.5       | C44—C47—H47C  | 109.5     |
| H20A—C20—H20C | 109.5       | H47A—C47—H47C | 109.5     |
| H20B—C20—H20C | 109.5       | H47B—C47—H47C | 109.5     |

### Crystal structure of **9**

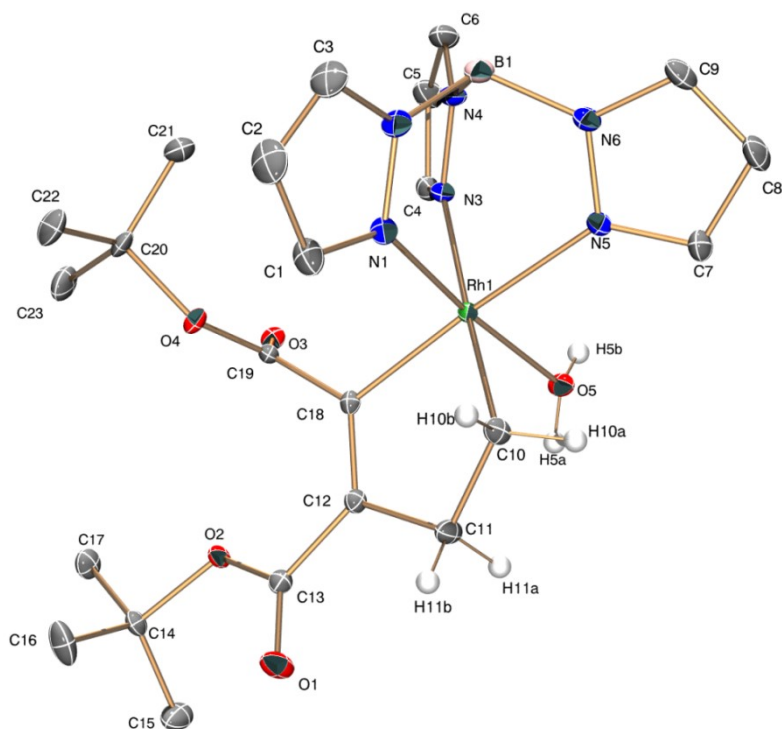

**Figure S5:** Structural diagram of the asymmetric unit of **9** showing 50% ellipsoids and the atom numbering. Most H-atoms and the  $\text{CHCl}_3$  solvent molecule were omitted.

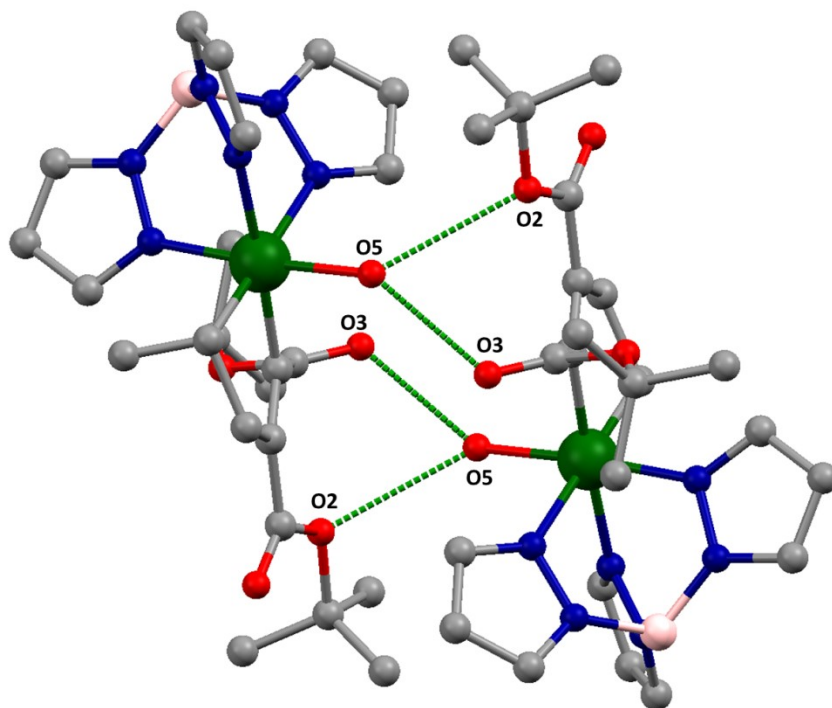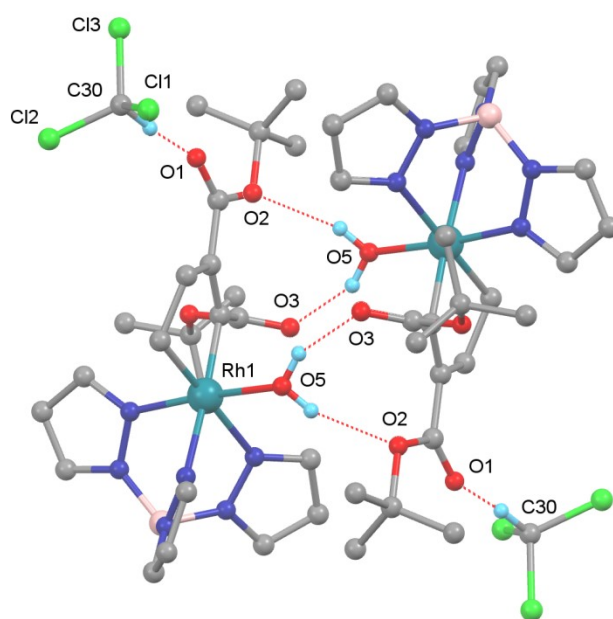

**Figure S6:** Structural diagram of the  $O_{(\text{water})}\text{-H}\cdots\text{O}$  and  $\text{C}_{(\text{CHCl}_3)}\text{-H}\cdots\text{O}$  hydrogen bonding pattern in the solid state structure of **9**. The two Rh complexes are related by inversion. They are cyclically linked by the four  $\text{O-H}\cdots\text{O}$  bonds into a dimer.  $\text{O5}\cdots\text{O2} = 2.861(2) \text{ \AA}$ ,  $\text{O5}\cdots\text{O3} = 2.631(2) \text{ \AA}$ ,  $\text{C30}\cdots\text{O1} = 3.005(2) \text{ \AA}$ .

**Table S7:** Geometric data (Å, deg) of **9**.

## Bond distances

|         |             |          |             |
|---------|-------------|----------|-------------|
| Rh1—N1  | 1.9906 (13) | C8—H8    | 0.9500      |
| Rh1—C18 | 2.0050 (14) | C9—H9    | 0.9500      |
| Rh1—C10 | 2.0349 (15) | C10—C11  | 1.536 (2)   |
| Rh1—O5  | 2.0788 (11) | C10—H10A | 0.9900      |
| Rh1—N5  | 2.1166 (12) | C10—H10B | 0.9900      |
| Rh1—N3  | 2.1906 (13) | C11—C12  | 1.511 (2)   |
| N1—C1   | 1.331 (2)   | C11—H11A | 0.9900      |
| N1—N2   | 1.3600 (18) | C11—H11B | 0.9900      |
| N2—C3   | 1.350 (2)   | C12—C18  | 1.3507 (19) |
| N2—B1   | 1.543 (2)   | C12—C13  | 1.4795 (19) |
| N3—C4   | 1.332 (2)   | C14—C15  | 1.516 (2)   |
| N3—N4   | 1.3605 (17) | C14—C17  | 1.517 (2)   |
| N4—C6   | 1.346 (2)   | C14—C16  | 1.517 (2)   |
| N4—B1   | 1.536 (2)   | C15—H15A | 0.9800      |
| N5—C7   | 1.3326 (19) | C15—H15B | 0.9800      |
| N5—N6   | 1.3583 (17) | C15—H15C | 0.9800      |
| N6—C9   | 1.347 (2)   | C16—H16A | 0.9800      |
| N6—B1   | 1.540 (2)   | C16—H16B | 0.9800      |
| O1—C13  | 1.2098 (18) | C16—H16C | 0.9800      |
| O2—C13  | 1.3514 (18) | C17—H17A | 0.9800      |
| O2—C14  | 1.4921 (17) | C17—H17B | 0.9800      |
| O3—C19  | 1.2197 (18) | C17—H17C | 0.9800      |
| O4—C19  | 1.3312 (17) | C18—C19  | 1.480 (2)   |
| O4—C20  | 1.4870 (18) | C20—C23  | 1.517 (2)   |
| O5—H5A  | 0.839 (9)   | C20—C21  | 1.518 (2)   |
| O5—H5B  | 0.835 (9)   | C20—C22  | 1.520 (2)   |
| B1—H1B  | 1.14 (2)    | C21—H21A | 0.9800      |
| C1—C2   | 1.398 (2)   | C21—H21B | 0.9800      |
| C1—H1   | 0.9500      | C21—H21C | 0.9800      |
| C2—C3   | 1.372 (3)   | C22—H22A | 0.9800      |
| C2—H2   | 0.9500      | C22—H22B | 0.9800      |
| C3—H3   | 0.9500      | C22—H22C | 0.9800      |
| C4—C5   | 1.399 (2)   | C23—H23A | 0.9800      |
| C4—H4   | 0.9500      | C23—H23B | 0.9800      |

|       |           |          |             |
|-------|-----------|----------|-------------|
| C5—C6 | 1.375 (2) | C23—H23C | 0.9800      |
| C5—H5 | 0.9500    | C30—Cl2  | 1.745 (2)   |
| C6—H6 | 0.9500    | C30—Cl3  | 1.7527 (19) |
| C7—C8 | 1.395 (2) | C30—Cl1  | 1.759 (2)   |
| C7—H7 | 0.9500    | C30—H30  | 1.0000      |
| C8—C9 | 1.378 (2) |          |             |

#### Bond angles

|             |             |               |             |
|-------------|-------------|---------------|-------------|
| N1—Rh1—C18  | 92.65 (5)   | Rh1—C10—H10B  | 109.7       |
| N1—Rh1—C10  | 92.45 (6)   | H10A—C10—H10B | 108.2       |
| C18—Rh1—C10 | 81.19 (6)   | C12—C11—C10   | 108.32 (12) |
| N1—Rh1—O5   | 174.71 (5)  | C12—C11—H11A  | 110.0       |
| C18—Rh1—O5  | 92.59 (5)   | C10—C11—H11A  | 110.0       |
| C10—Rh1—O5  | 87.64 (5)   | C12—C11—H11B  | 110.0       |
| N1—Rh1—N5   | 87.63 (5)   | C10—C11—H11B  | 110.0       |
| C18—Rh1—N5  | 175.15 (5)  | H11A—C11—H11B | 108.4       |
| C10—Rh1—N5  | 93.97 (5)   | C18—C12—C13   | 127.07 (13) |
| O5—Rh1—N5   | 87.09 (5)   | C18—C12—C11   | 115.95 (12) |
| N1—Rh1—N3   | 88.26 (5)   | C13—C12—C11   | 116.93 (12) |
| C18—Rh1—N3  | 100.29 (5)  | O1—C13—O2     | 122.83 (13) |
| C10—Rh1—N3  | 178.34 (5)  | O1—C13—C12    | 123.16 (14) |
| O5—Rh1—N3   | 91.51 (5)   | O2—C13—C12    | 114.00 (12) |
| N5—Rh1—N3   | 84.56 (5)   | O2—C14—C15    | 110.13 (12) |
| C1—N1—N2    | 107.66 (13) | O2—C14—C17    | 102.55 (11) |
| C1—N1—Rh1   | 133.48 (11) | C15—C14—C17   | 110.38 (13) |
| N2—N1—Rh1   | 118.85 (10) | O2—C14—C16    | 110.16 (12) |
| C3—N2—N1    | 108.70 (14) | C15—C14—C16   | 112.80 (15) |
| C3—N2—B1    | 129.60 (14) | C17—C14—C16   | 110.34 (13) |
| N1—N2—B1    | 121.56 (12) | C14—C15—H15A  | 109.5       |
| C4—N3—N4    | 106.70 (12) | C14—C15—H15B  | 109.5       |
| C4—N3—Rh1   | 136.38 (10) | H15A—C15—H15B | 109.5       |
| N4—N3—Rh1   | 116.63 (10) | C14—C15—H15C  | 109.5       |
| C6—N4—N3    | 109.68 (13) | H15A—C15—H15C | 109.5       |
| C6—N4—B1    | 130.77 (13) | H15B—C15—H15C | 109.5       |
| N3—N4—B1    | 119.43 (12) | C14—C16—H16A  | 109.5       |
| C7—N5—N6    | 107.03 (12) | C14—C16—H16B  | 109.5       |

|            |             |               |             |
|------------|-------------|---------------|-------------|
| C7—N5—Rh1  | 134.66 (10) | H16A—C16—H16B | 109.5       |
| N6—N5—Rh1  | 118.26 (9)  | C14—C16—H16C  | 109.5       |
| C9—N6—N5   | 109.55 (13) | H16A—C16—H16C | 109.5       |
| C9—N6—B1   | 131.13 (13) | H16B—C16—H16C | 109.5       |
| N5—N6—B1   | 119.30 (12) | C14—C17—H17A  | 109.5       |
| C13—O2—C14 | 120.27 (11) | C14—C17—H17B  | 109.5       |
| C19—O4—C20 | 122.12 (12) | H17A—C17—H17B | 109.5       |
| Rh1—O5—H5A | 126.3 (15)  | C14—C17—H17C  | 109.5       |
| Rh1—O5—H5B | 117.5 (15)  | H17A—C17—H17C | 109.5       |
| H5A—O5—H5B | 104 (2)     | H17B—C17—H17C | 109.5       |
| N4—B1—N6   | 108.25 (13) | C12—C18—C19   | 127.53 (13) |
| N4—B1—N2   | 109.07 (13) | C12—C18—Rh1   | 116.32 (10) |
| N6—B1—N2   | 107.62 (13) | C19—C18—Rh1   | 116.12 (10) |
| N4—B1—H1B  | 112.1 (12)  | O3—C19—O4     | 124.70 (13) |
| N6—B1—H1B  | 109.9 (12)  | O3—C19—C18    | 124.28 (13) |
| N2—B1—H1B  | 109.8 (12)  | O4—C19—C18    | 110.69 (12) |
| N1—C1—C2   | 109.72 (16) | O4—C20—C23    | 111.24 (12) |
| N1—C1—H1   | 125.1       | O4—C20—C21    | 108.83 (12) |
| C2—C1—H1   | 125.1       | C23—C20—C21   | 112.76 (15) |
| C3—C2—C1   | 104.97 (15) | O4—C20—C22    | 101.67 (13) |
| C3—C2—H2   | 127.5       | C23—C20—C22   | 110.72 (14) |
| C1—C2—H2   | 127.5       | C21—C20—C22   | 111.08 (14) |
| N2—C3—C2   | 108.94 (15) | C20—C21—H21A  | 109.5       |
| N2—C3—H3   | 125.5       | C20—C21—H21B  | 109.5       |
| C2—C3—H3   | 125.5       | H21A—C21—H21B | 109.5       |
| N3—C4—C5   | 110.36 (14) | C20—C21—H21C  | 109.5       |
| N3—C4—H4   | 124.8       | H21A—C21—H21C | 109.5       |
| C5—C4—H4   | 124.8       | H21B—C21—H21C | 109.5       |
| C6—C5—C4   | 104.67 (14) | C20—C22—H22A  | 109.5       |
| C6—C5—H5   | 127.7       | C20—C22—H22B  | 109.5       |
| C4—C5—H5   | 127.7       | H22A—C22—H22B | 109.5       |
| N4—C6—C5   | 108.59 (14) | C20—C22—H22C  | 109.5       |
| N4—C6—H6   | 125.7       | H22A—C22—H22C | 109.5       |
| C5—C6—H6   | 125.7       | H22B—C22—H22C | 109.5       |
| N5—C7—C8   | 110.08 (14) | C20—C23—H23A  | 109.5       |
| N5—C7—H7   | 125.0       | C20—C23—H23B  | 109.5       |

|              |             |               |             |
|--------------|-------------|---------------|-------------|
| C8—C7—H7     | 125.0       | H23A—C23—H23B | 109.5       |
| C9—C8—C7     | 105.00 (14) | C20—C23—H23C  | 109.5       |
| C9—C8—H8     | 127.5       | H23A—C23—H23C | 109.5       |
| C7—C8—H8     | 127.5       | H23B—C23—H23C | 109.5       |
| N6—C9—C8     | 108.34 (14) | Cl2—C30—Cl3   | 111.44 (11) |
| N6—C9—H9     | 125.8       | Cl2—C30—Cl1   | 110.86 (10) |
| C8—C9—H9     | 125.8       | Cl3—C30—Cl1   | 110.17 (10) |
| C11—C10—Rh1  | 109.77 (10) | Cl2—C30—H30   | 108.1       |
| C11—C10—H10A | 109.7       | Cl3—C30—H30   | 108.1       |
| Rh1—C10—H10A | 109.7       | Cl1—C30—H30   | 108.1       |
| C11—C10—H10B | 109.7       |               |             |

## 2. COMPUTATIONAL DETAILS

### 2.1 Ligand exchange. Relaxed Potential Energy (PES) scans concerning ethylene release at $\kappa^2\text{-A}\cdot\text{C}_2\text{H}_2$ and $\kappa^2\text{-B}\cdot\text{C}_2\text{H}_4$ .

Species  $\kappa^2\text{-A}\cdot\text{C}_2\text{H}_2$  arises from the coordination of an alkyne molecule to  $\kappa^2\text{-A}$ , whereas the isomer  $\kappa^2\text{-B}\cdot\text{C}_2\text{H}_4$  is formed by ethylene addition to  $\kappa^2\text{-B}$ . Since no cyclotrimerization product was detected experimentally for the acetylene system, we do not expect  $\kappa^2\text{-B}$  to be an intermediate in the formation of **12**, as it would lead to the formation of **B**, then to **D** and, under an acetylene atmosphere, to  $\text{D}\cdot\text{C}_2\text{H}_2$  and, finally, to the benzene adduct  $\text{TpRh}(\text{C}_6\text{H}_6)$ . Therefore, although the profile for  $\kappa^2\text{-B}\cdot\text{C}_2\text{H}_4$  is attached for the sake of comparison, we will focus on ethylene loss from isomer  $\kappa^2\text{-A}\cdot\text{C}_2\text{H}_2$ . Unfortunately, and despite many attempts, we were unable to locate transition states associated with these processes. Nevertheless, relaxed potential energy scans of the  $\text{Rh-C}_{\text{ethylene}}$  bond distance allowed us to obtain valuable information (in the scans, the  $\text{Rh-C=C}$  angle was frozen to ensure a reasonable detachment).

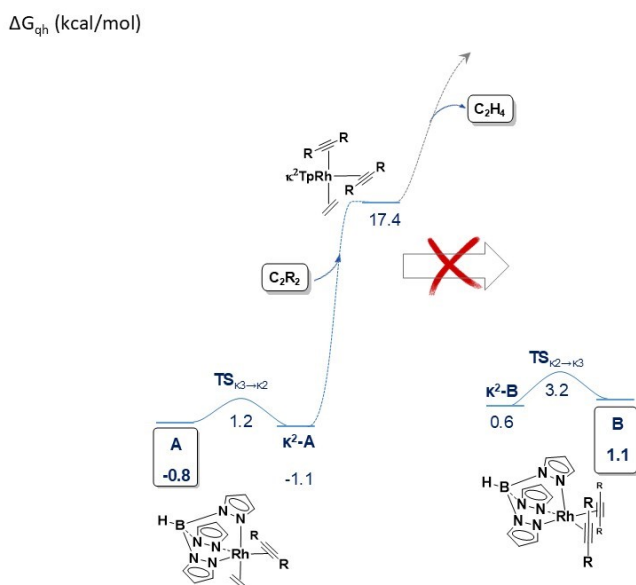

**Figure S7.** Associative ligand exchange from **A** via  $\kappa^2$  intermediates. While acetylene extrusion from the high energy intermediate is almost barrier-less, ethene dissociation renders the overall formation of **B** more difficult than *via* associative exchange. Figures S7a to S7e illustrate the relaxed potential energy scans for ethene and acetylene dissociation leading to the above conclusion.

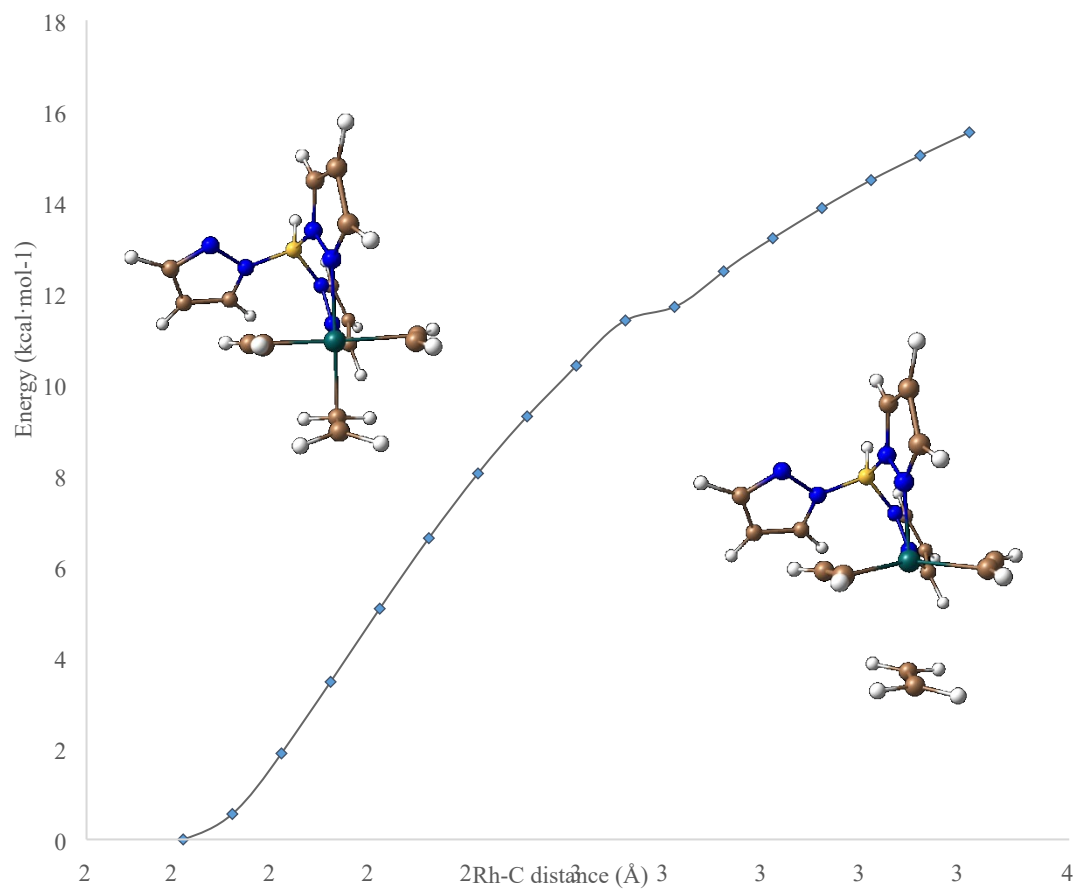

**Figure S7a.** Relaxed potential energy scan of the Rh-C<sub>ethylene</sub> bond distance of isomer  $\kappa^2$ -**A**·C<sub>2</sub>H<sub>2</sub>.

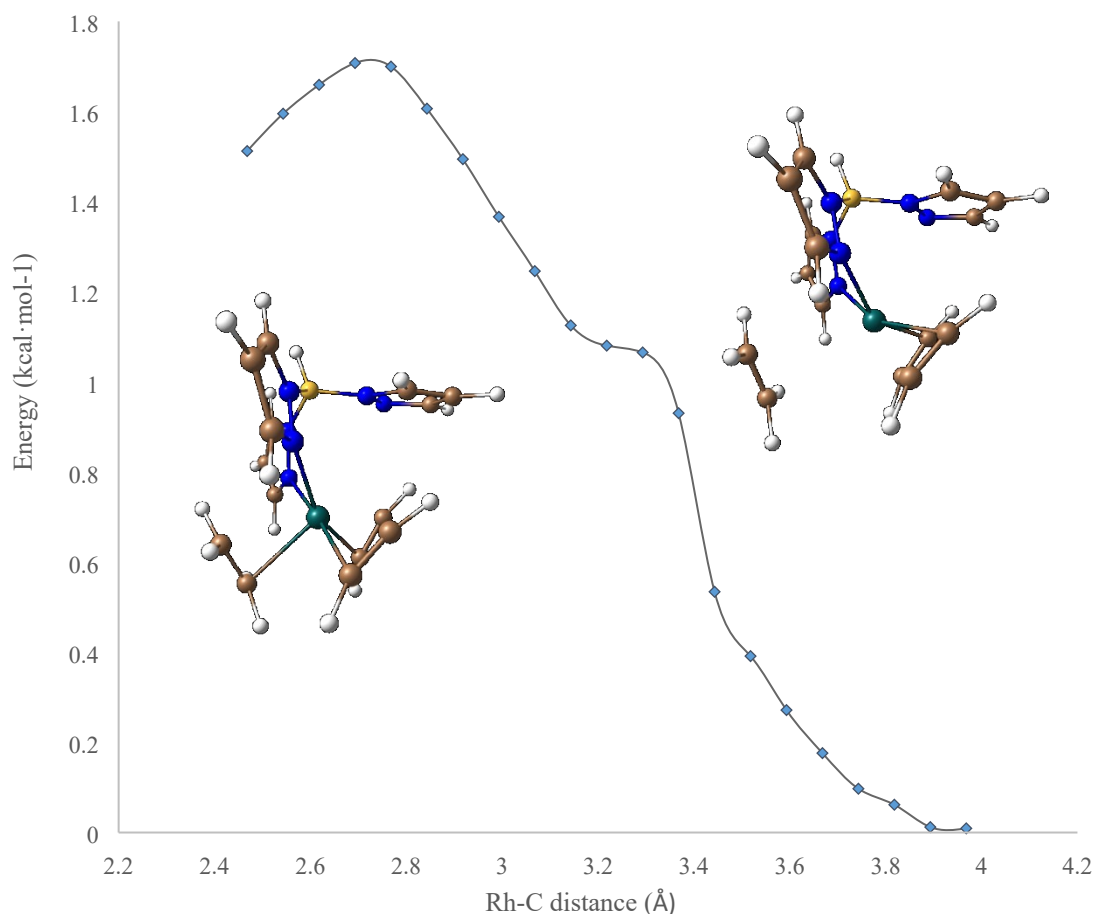

**Figure S7b.** Relaxed potential energy scan of the Rh-C<sub>ethylene</sub> bond distance of isomer  $\kappa^2$ -**B**·C<sub>2</sub>H<sub>4</sub>.

For isomer  $\kappa^2$ -**A**·C<sub>2</sub>H<sub>2</sub>, ethylene loss requires a considerable barrier. In addition, it does not afford square planar  $\kappa^2$ -**A**, then a subsequent isomerization should take place. The energies associated with these processes are higher than those calculated for carbon-carbon coupling at **A**, something that is in agreement with the absence of cyclotrimerization products in the reactions of **1** with acetylene. On the contrary, ethylene dissociation from isomer  $\kappa^2$ -**B**·C<sub>2</sub>H<sub>4</sub> has a very low energy barrier.

It is also worth mentioning that dissociation of either acetylene ligand from  $\kappa^2$ -**A**·C<sub>2</sub>H<sub>2</sub> to afford  $\kappa^2$ -**A** has a lower energy barrier than that found for dissociation of ethylene.

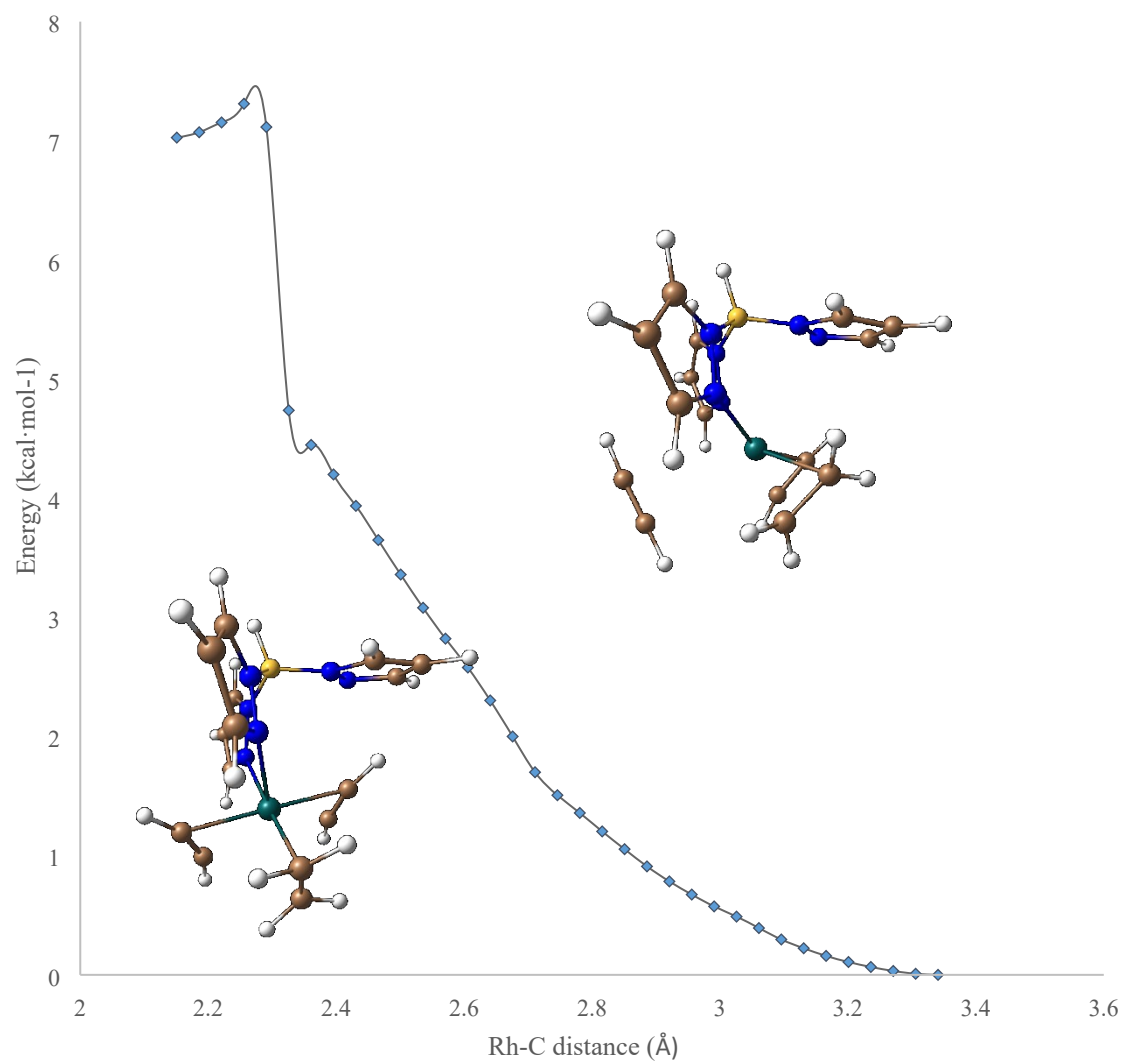

**Figure S7c.** Relaxed potential energy scan of the Rh-C<sub>acetylene1</sub> bond distance of isomer  $\kappa^2\text{-A}\cdot\text{C}_2\text{H}_2$ .

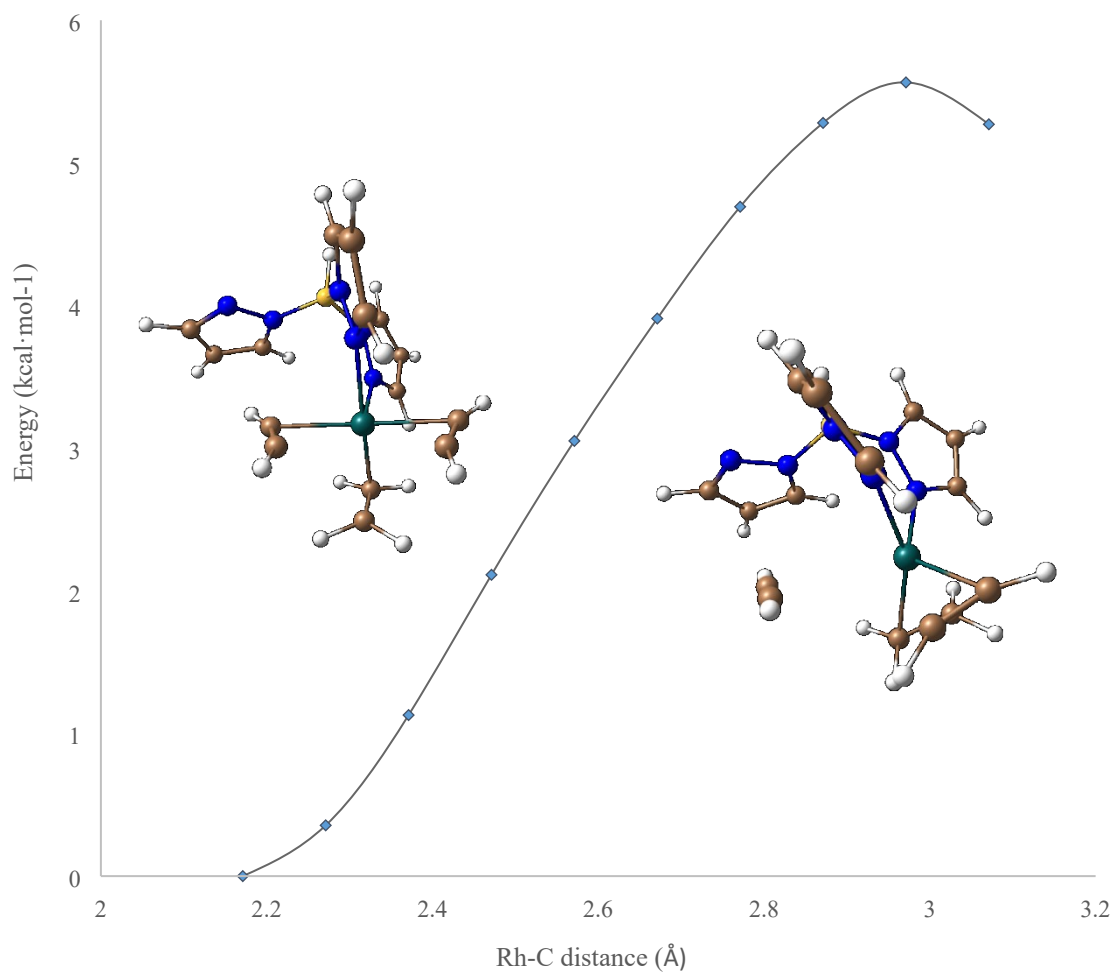

**Figure S7d.** Relaxed potential energy scan of the Rh-C<sub>acetylene2</sub> bond distance of isomer  $\kappa^2\text{-A}\cdot\text{C}_2\text{H}_2$ .

An analogous situation occurs in the DMAD system in which the dissociation of ethylene from  $\kappa^2\text{-A}'\cdot\text{DMAD}$  is associated with a barrier that is higher than the one found for ethylene loss from **A'** to afford [TpRh(DMAD)].

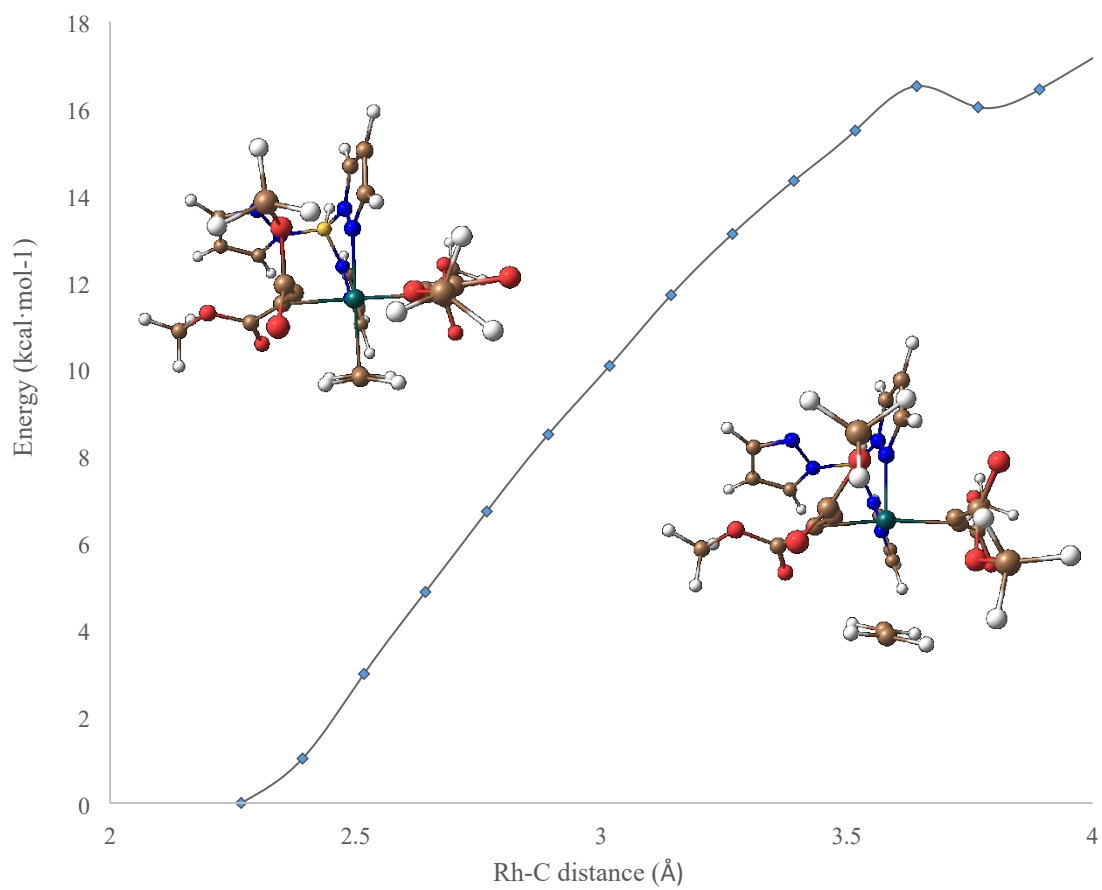

**Figure S7e.** Relaxed potential energy scan of the Rh-C<sub>ethylene</sub> bond distance of  $\kappa^2$ -A<sup>1</sup>-DMAD.

## 2.2 Carbon-carbon coupling occurring at $\kappa^2$ -Tp species.

C-C coupling at  $\kappa^2$ -Tp to afford rhodacycles is unlikely since the energy barriers associated with these processes are higher than those found for C-C coupling at **A** and **A'**.

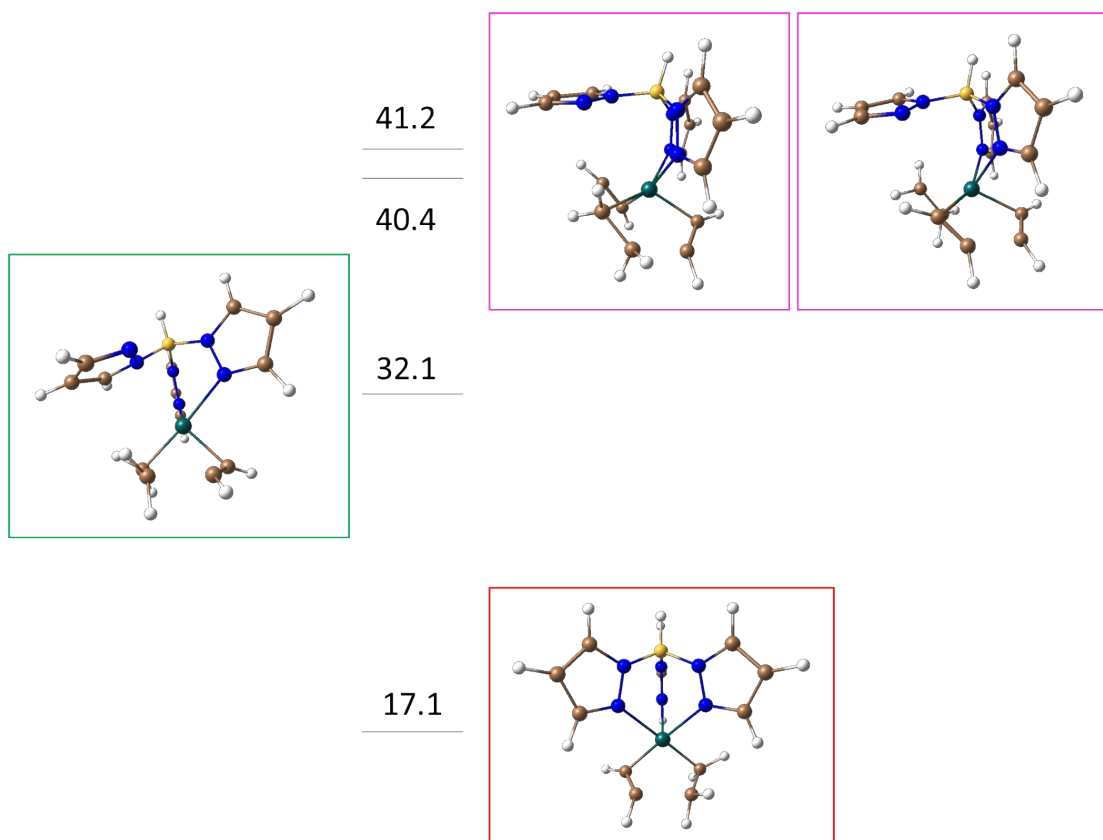

**Figure S8.**  $\Delta G_{\text{q}h}^{\ddagger}$  ( $\text{kcal}\cdot\text{mol}^{-1}$ ) corresponding to carbon-carbon coupling taking place at **A**,  $\kappa^2$ -**A** and  $\kappa^2$ -**A**· $\text{C}_2\text{H}_2$ , relative to **1**.

### 2.3 Electronic structure of intermediates on the way of formation of **12**.

The connectivity of the atoms of intermediate **G** was followed during its evolution to afford the reaction product **12** along the intrinsic reaction coordinate connecting the two species by means of localized orbital analysis. The position of the centroids of the localized orbitals (purple dots in the figures below) was used to follow the changes in the connectivity.

These results were obtained following the Pipek-Mezey (Pipek, J.; Mezey, P. G. *J. Chem. Phys.* **1989**, *90*, 4916) criterion and the procedure described by Vidossich and Lledós (Vidossich, P.; Lledós, A. *Dalton Trans.* **2014**, *43*, 11145). A typical input file for the generation of the formatted checkpoint file is also attached.

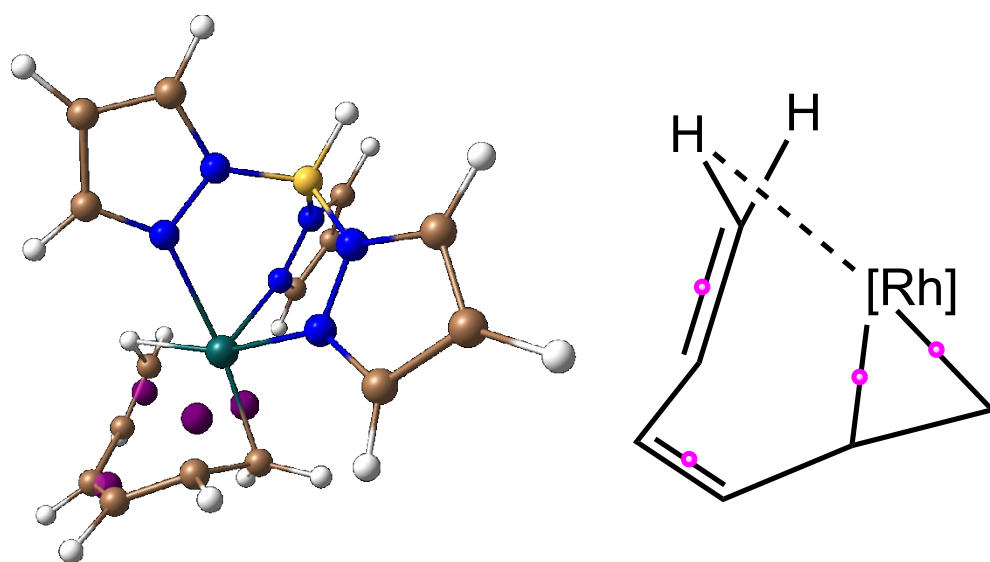

**Figure S9a.** Localized molecular orbital study of intermediate **G**. Purple dots represent the centroids of 2 C-Rh and 2 C-C  $\sigma$  and  $\pi$  bonds. According to this distribution, a metallacyclopropane formulation is proposed.

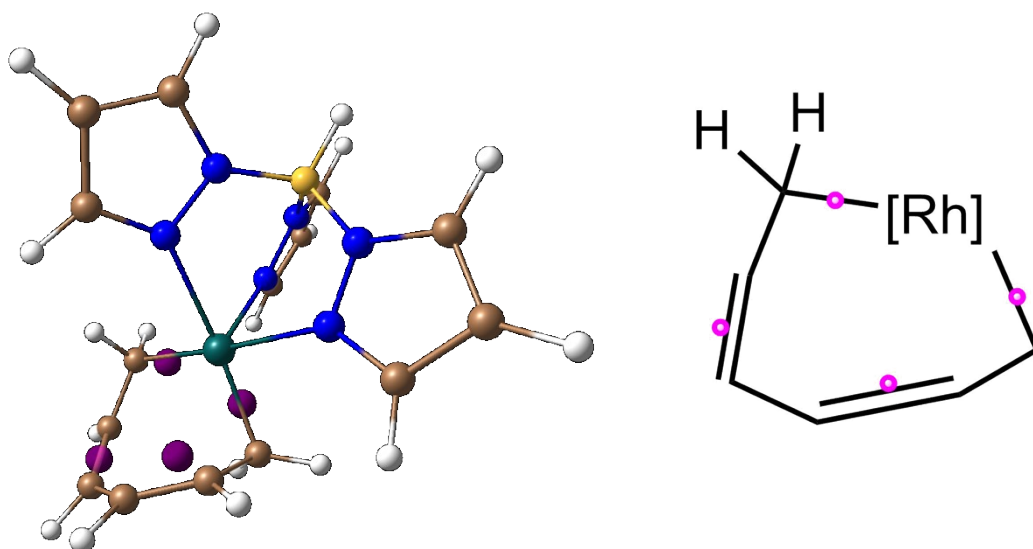

**Figure S9b.** Localized molecular orbital study compound **12**. Purple dots represent the centroids of 2 C-Rh and 2 C-C  $\sigma$  and  $\pi$  bonds. Their disposition agrees with the expected Rh-alkyl and Rh-allyl formulation.

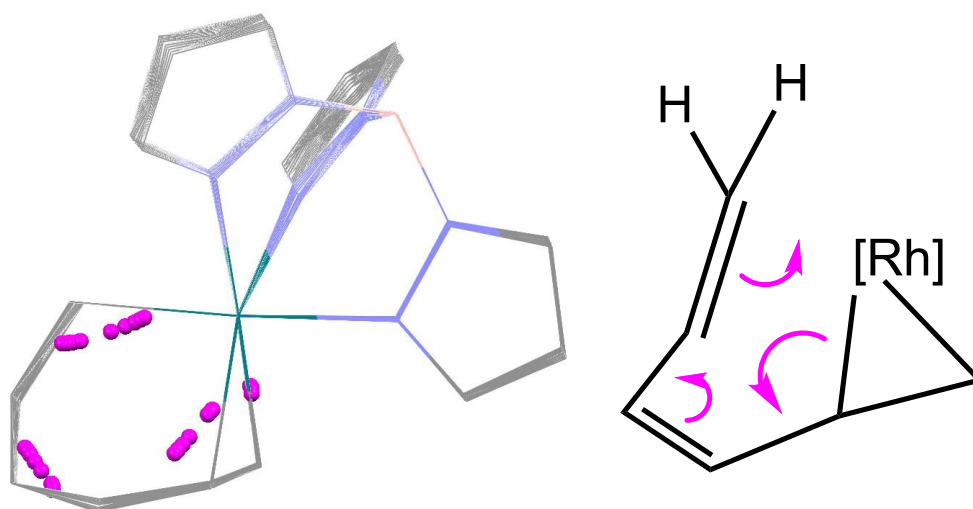

**Figure S9c.** Representation of the evolution of the centroids of selected localized molecular orbitals along the intrinsic reaction coordinate for the transformation of **G** into **12** evincing a synchronous electron reorganization.

## Typical Gaussian input for orbital localization using the Pipek-Mezey scheme

```
%mem=8192MB
%chk=rh_allyl.chk
#p wb97xd/genecp symmetry=none nosymm

Rh_allyl

0 1
coords

Rh 0
SDD
****
C H N B 0
6-31G(d,p)
****

Rh 0
SDD

--Link1--
%mem=8192MB
%chk=rh_allyl.chk
#p IOp(4/9=20212) guess=(read,only,local,save,nosymm)
geom=allcheck pop=full wb97xd/genecp symmetry=none nosymm

Rh 0
SDD
****
C H N B 0
6-31G(d,p)
****

Rh 0
SDD
```

## 2.4 Alternative initial step in the formation of 12.

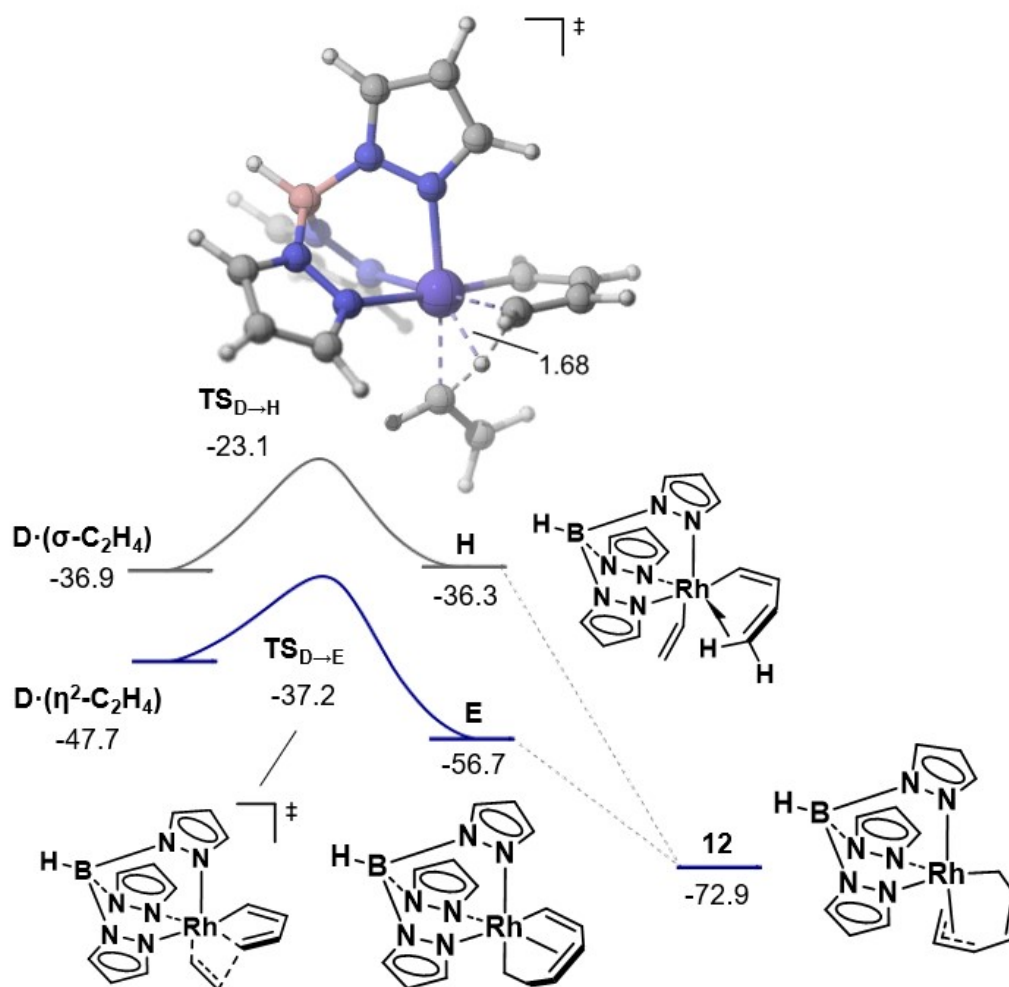

**Figure S10.** Energy profile ( $\Delta G_{\text{qh}}$  in  $\text{kcal}\cdot\text{mol}^{-1}$ ) for hydrogen migration from coordinated ethylene to the rhodacyclopentadiene of  $D\text{-C}_2\text{H}_4$  as an alternative initial step to **12**.  $D\text{-}\sigma\text{-C}_2\text{H}_4$  features an interaction between the metal and  $\sigma\text{-C-H}$  electron density of the alkene. The overall energy barrier for this transformation from  $D\cdot\eta^2\text{-C}_2\text{H}_4$  is  $24.6\text{ kcal}\cdot\text{mol}^{-1}$ . All energies are relative to  $\mathbf{1} + 2\text{C}_2\text{H}_2 - \text{C}_2\text{H}_4$ .

### 3. NMR spectra for complexes 3-5, 8-19.

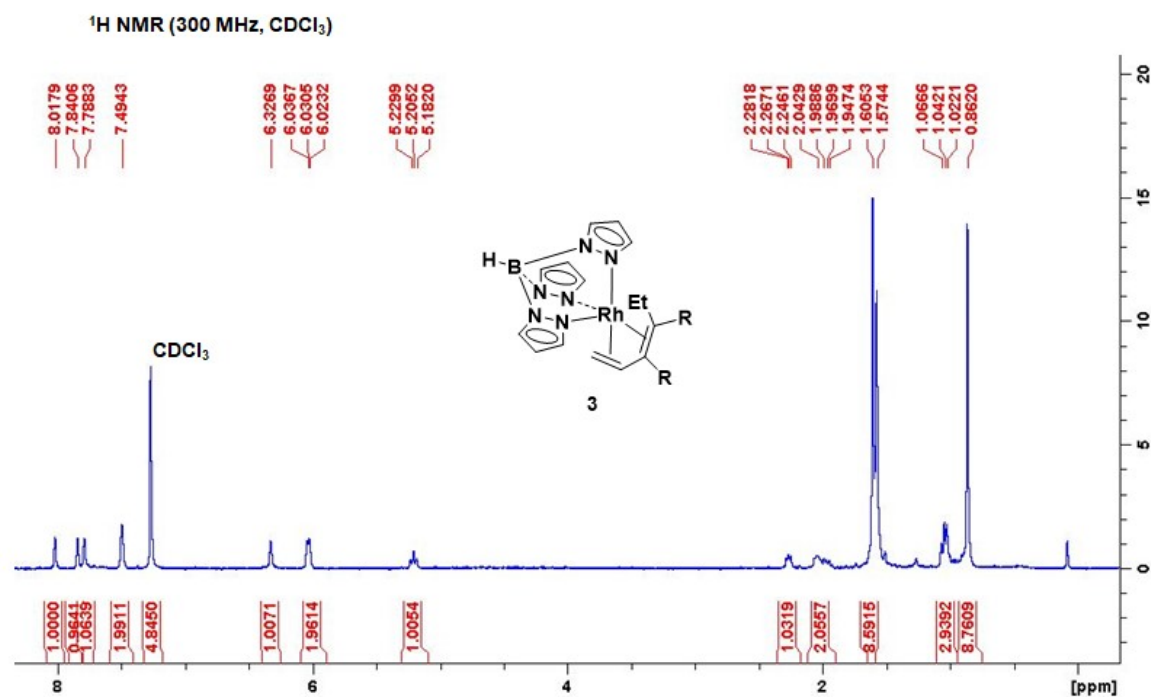

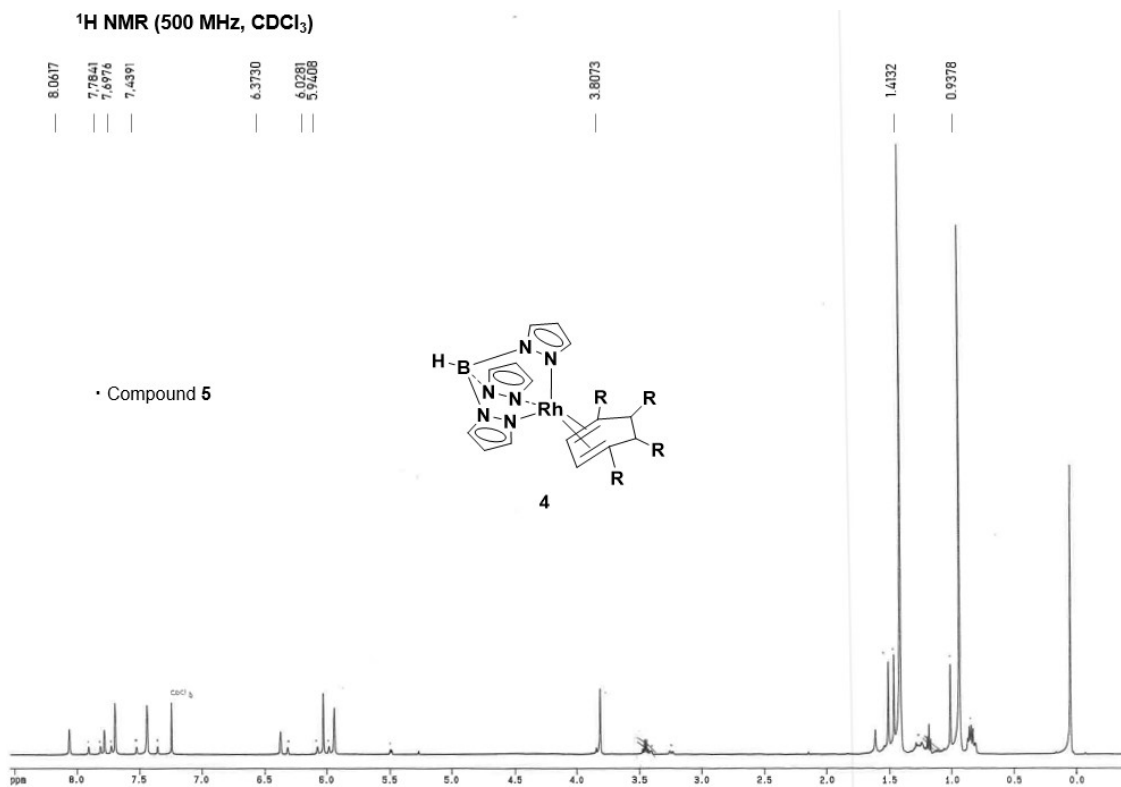

**Figure S13.** <sup>1</sup>H NMR spectrum of compound 4 (R = CO<sub>2</sub><sup>t</sup>Bu).

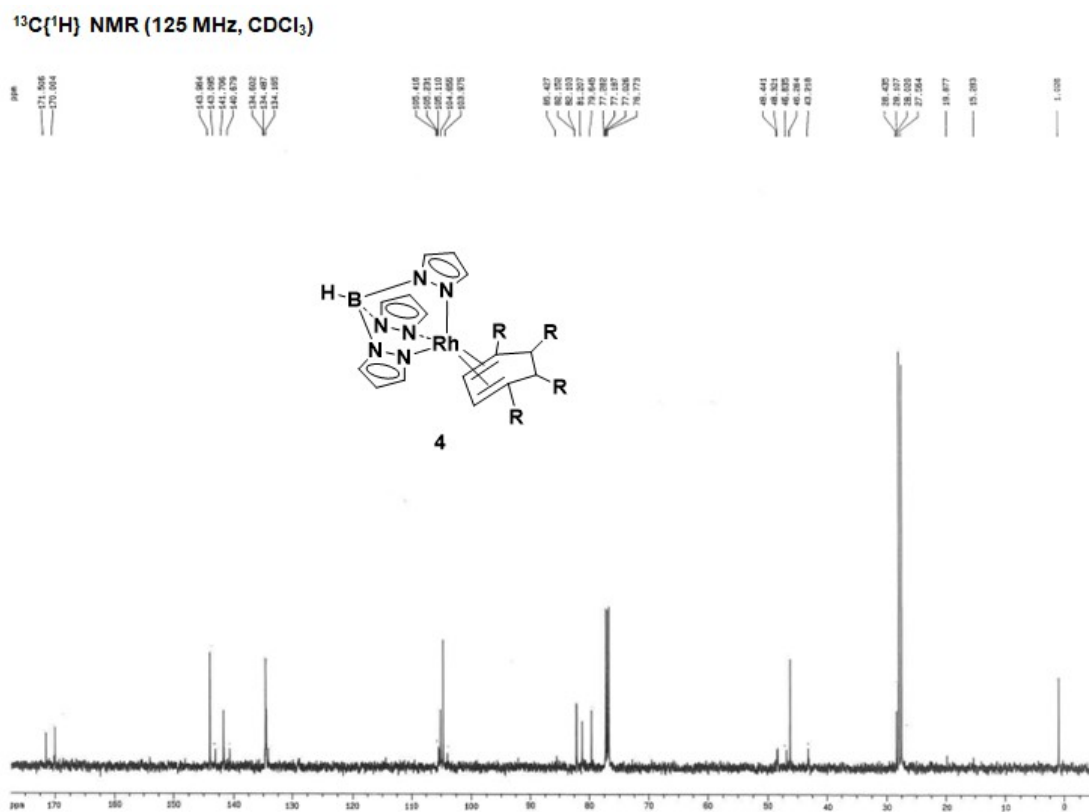

**Figure S14.** <sup>13</sup>C{<sup>1</sup>H} NMR spectrum of compound 4 (R = CO<sub>2</sub><sup>t</sup>Bu).



**Figure S16.**  $^{13}\text{C}\{^1\text{H}\}$  NMR spectrum of compound **5** ( $\text{R} = \text{CO}_2^t\text{Bu}$ ).

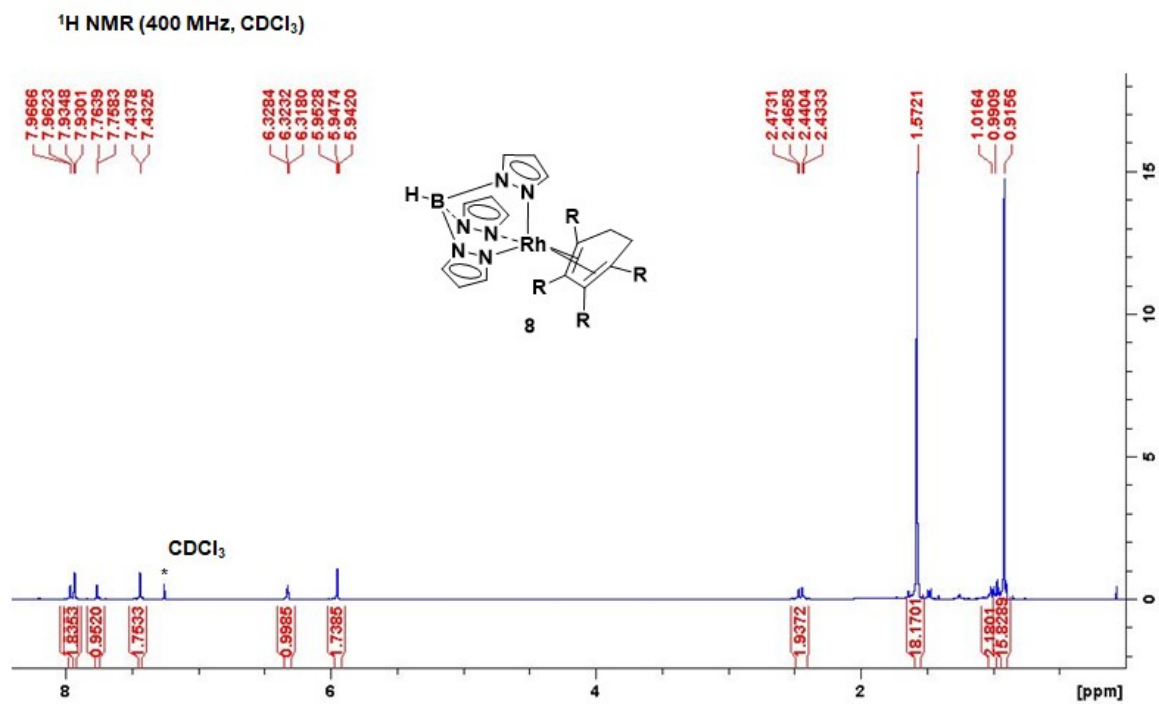

**Figure S17.**  $^1\text{H}$  NMR spectrum of compound **8** ( $\text{R} = \text{CO}_2^t\text{Bu}$ ).

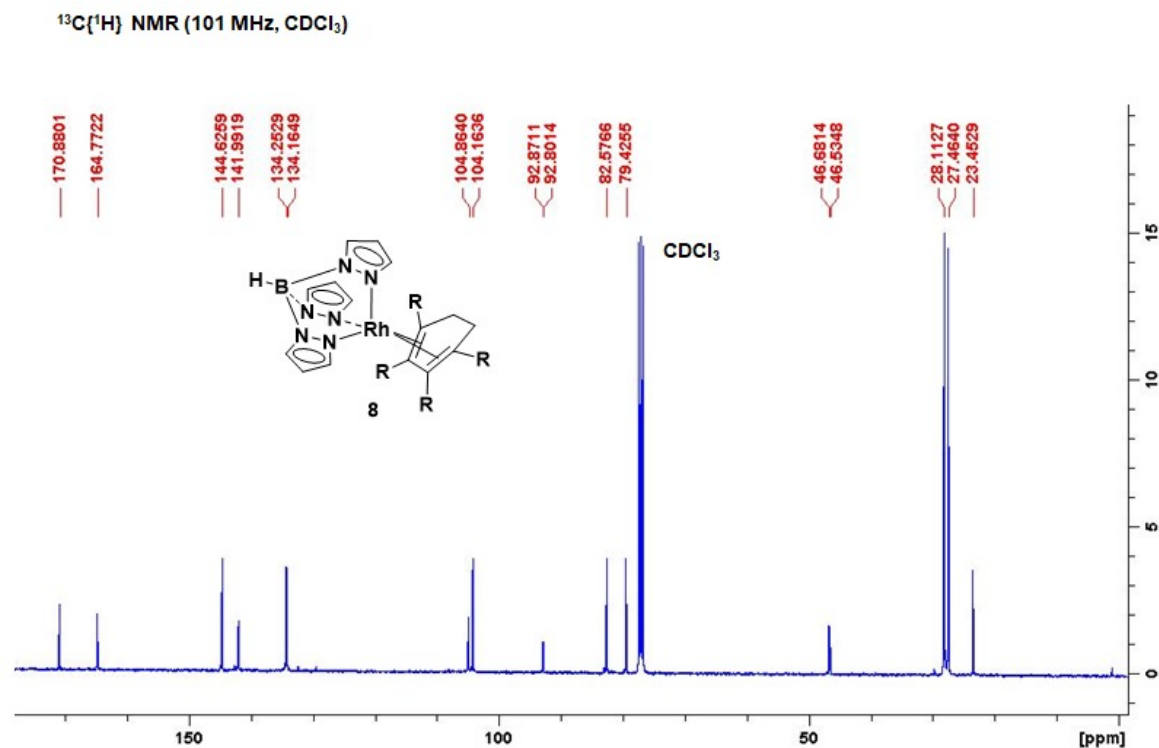

**Figure S18.**  $^{13}\text{C}\{^1\text{H}\}$  NMR spectrum of compound **8** ( $\text{R} = \text{CO}_2^t\text{Bu}$ ).

<sup>1</sup>H NMR (400 MHz, CDCl<sub>3</sub>)

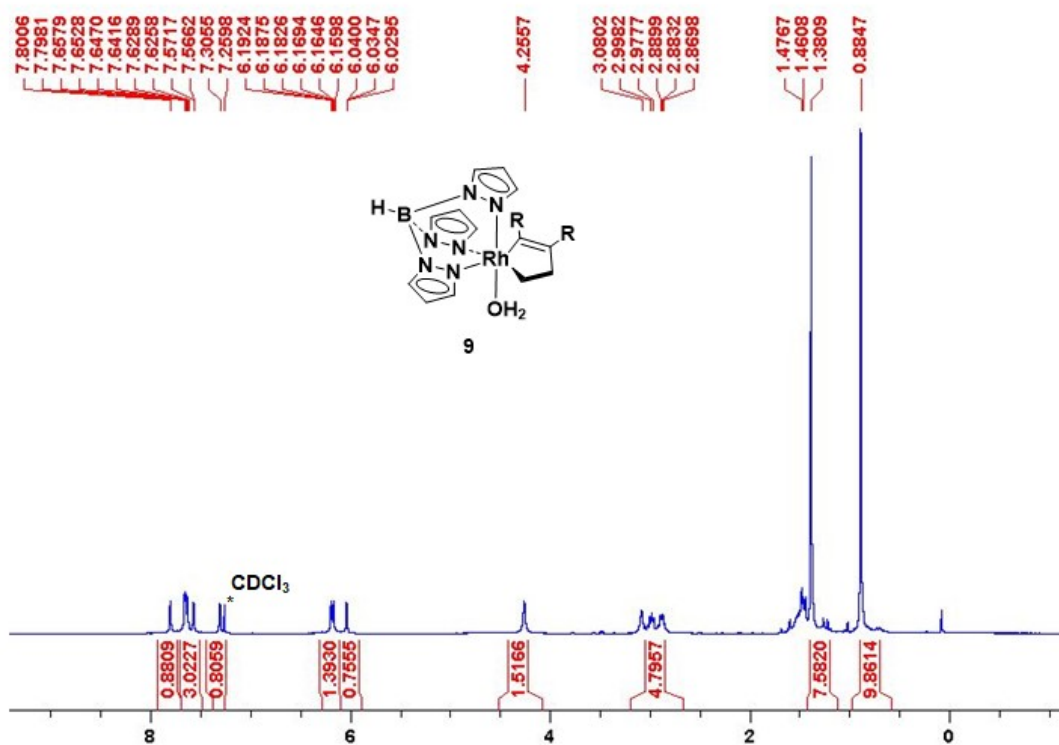

Figure S19. <sup>1</sup>H NMR spectrum of compound 9 (R = CO<sub>2</sub><sup>t</sup>Bu).

<sup>13</sup>C{<sup>1</sup>H} NMR (101 MHz, CDCl<sub>3</sub>)

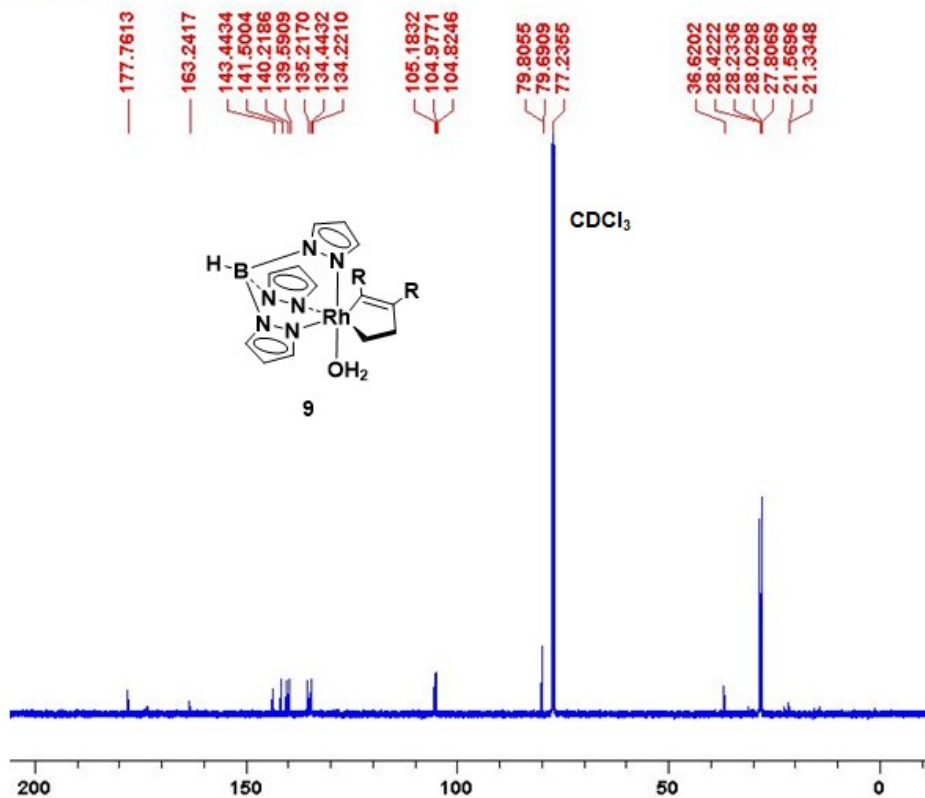

Figure S20. <sup>13</sup>C{<sup>1</sup>H} NMR spectrum of compound 9 (R = CO<sub>2</sub><sup>t</sup>Bu).

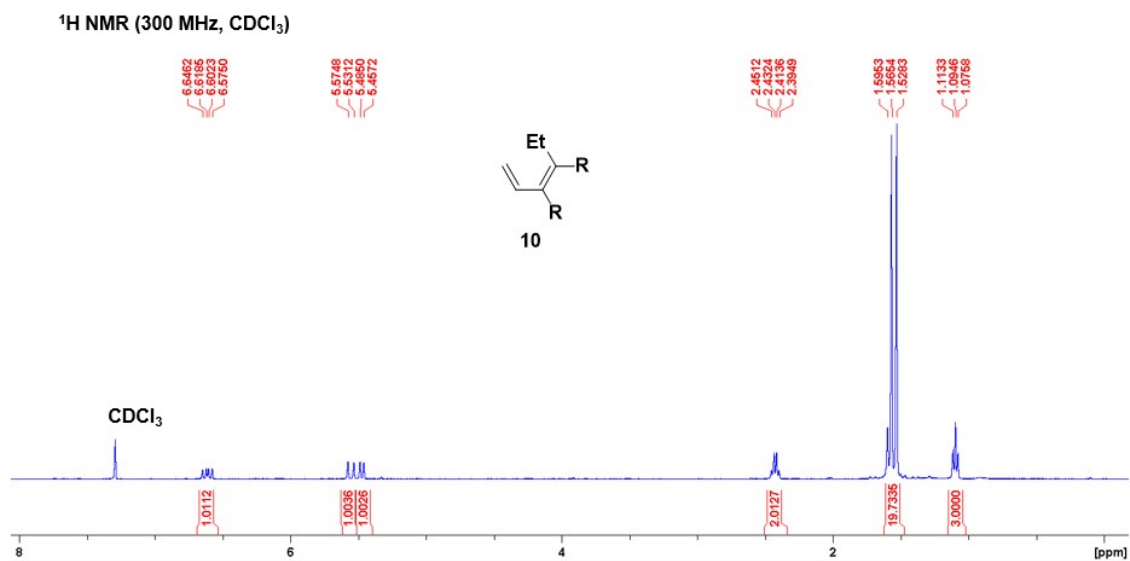

**Figure S21.** <sup>1</sup>H NMR spectrum of compound **10** (R = CO<sub>2</sub><sup>t</sup>Bu).

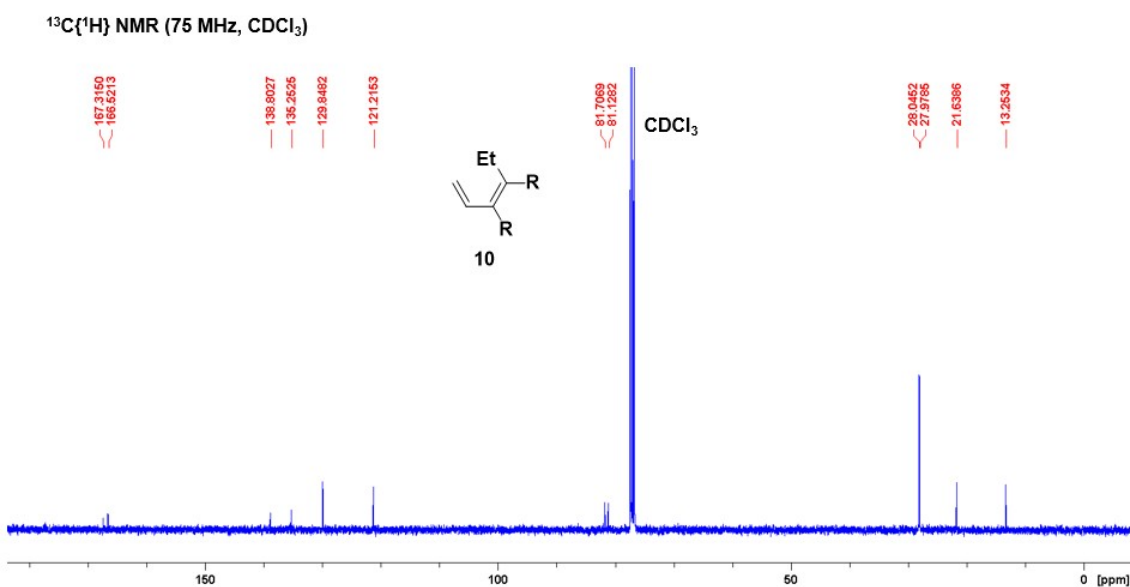

**Figure S22.** <sup>13</sup>C{<sup>1</sup>H} NMR spectrum of compound **10** (R = CO<sub>2</sub><sup>t</sup>Bu).

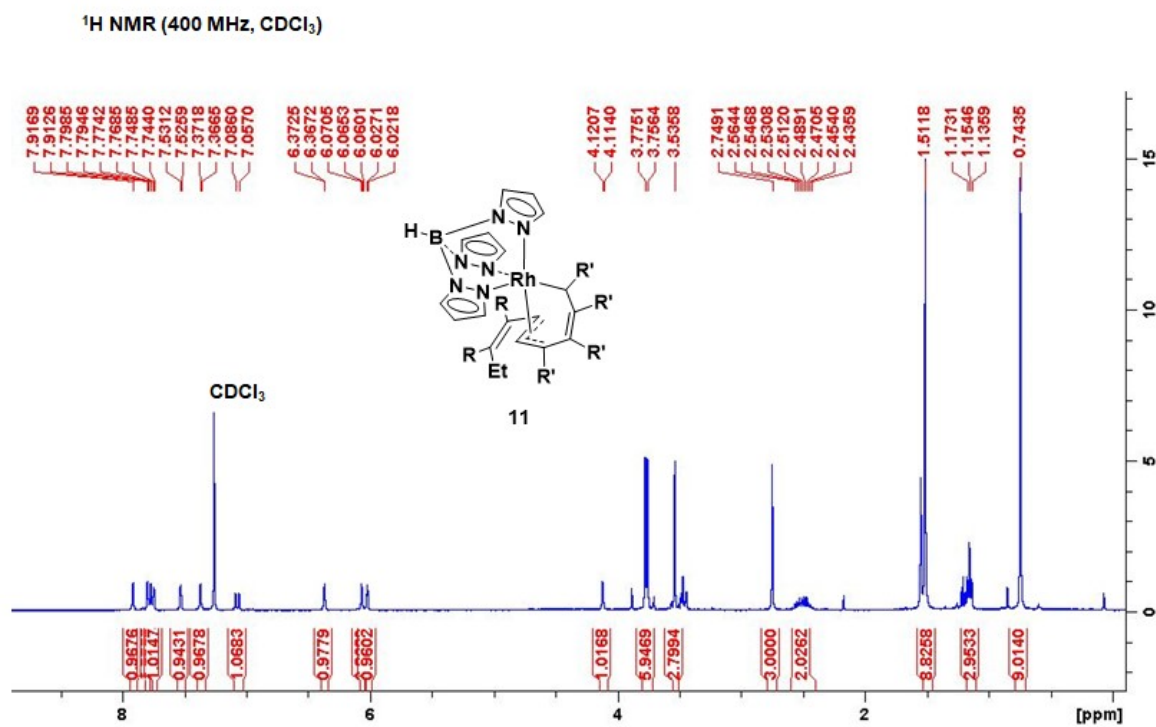

**Figure S23.** <sup>1</sup>H NMR spectrum of compound **11** (R = CO<sub>2</sub><sup>t</sup>Bu, R' = CO<sub>2</sub>Me).

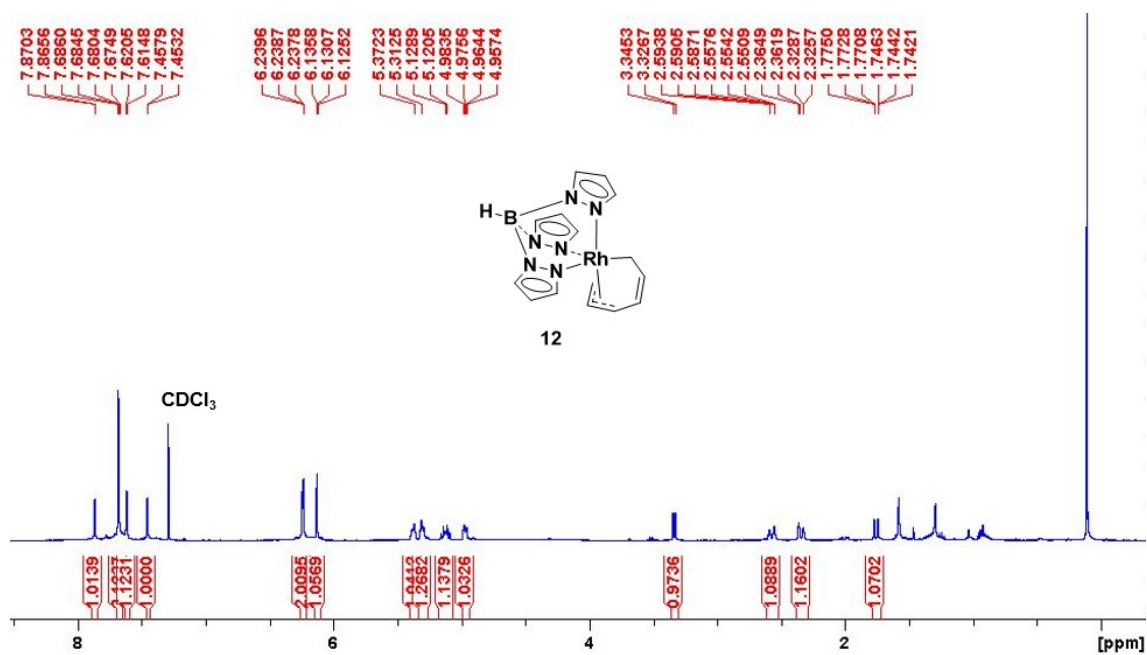

**Figure S24.** <sup>1</sup>H NMR spectrum of compound **12**.



$^{13}\text{C}\{^1\text{H}\}$  NMR (75 MHz,  $\text{CDCl}_3$ )

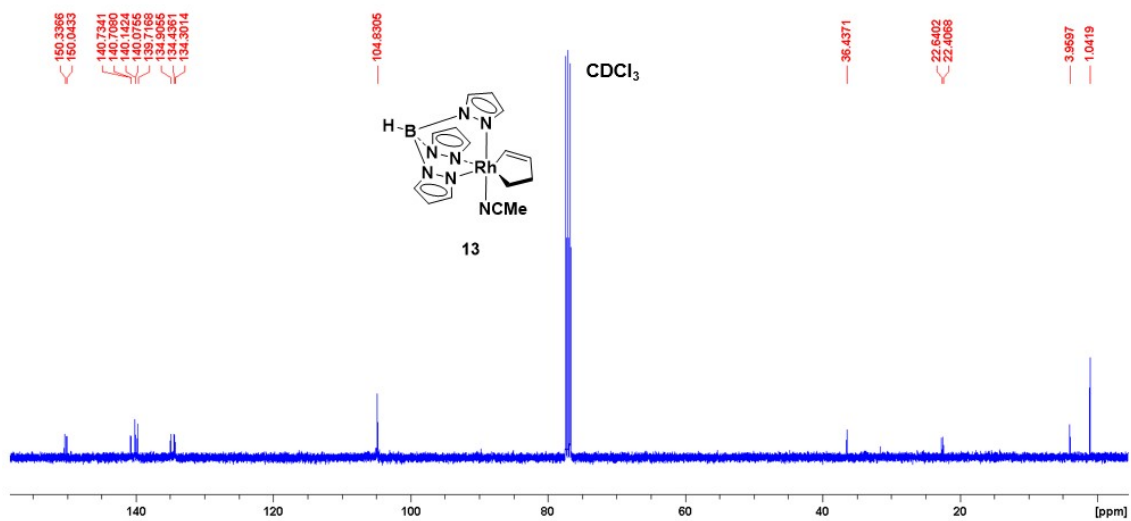

Figure S27.  $^{13}\text{C}\{^1\text{H}\}$  NMR spectrum of compound 13.

$^1\text{H}$  NMR (400 MHz,  $\text{CDCl}_3$ )

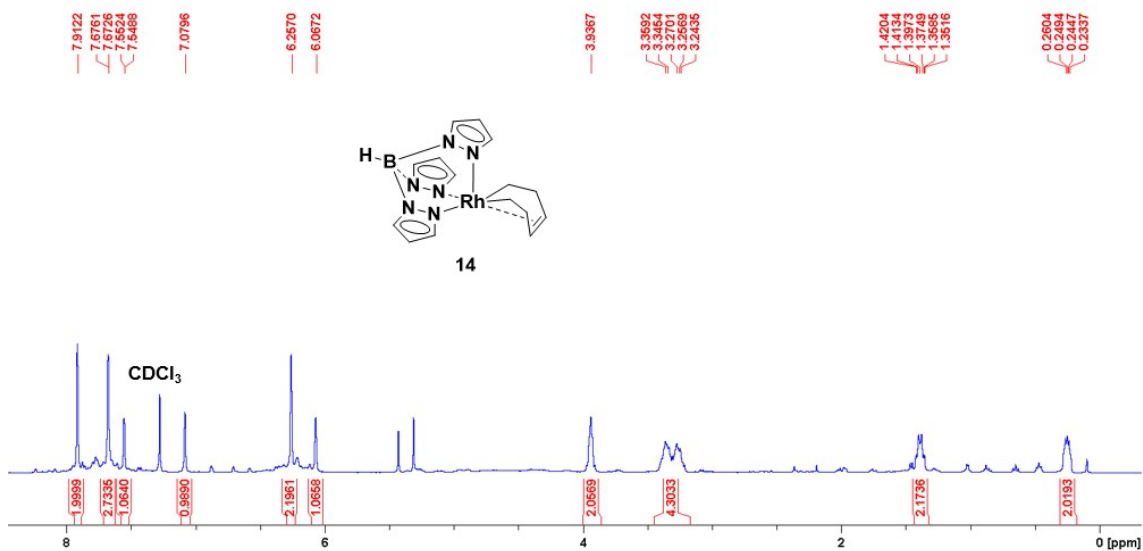

Figure S28.  $^1\text{H}$  NMR spectrum of compound 14.

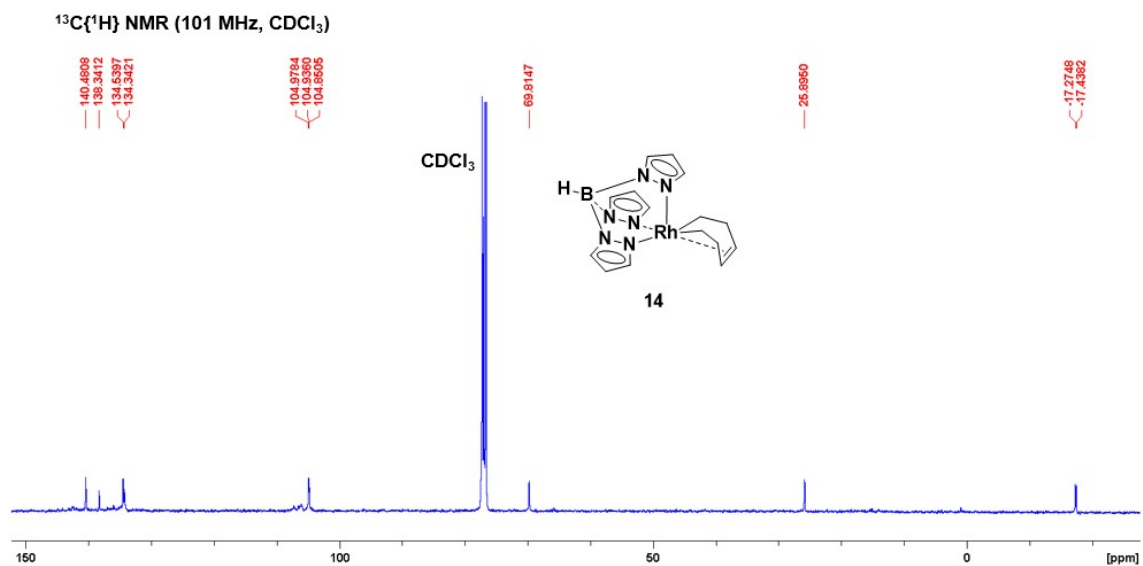

Figure S29. <sup>13</sup>C{<sup>1</sup>H} NMR spectrum of compound 14.

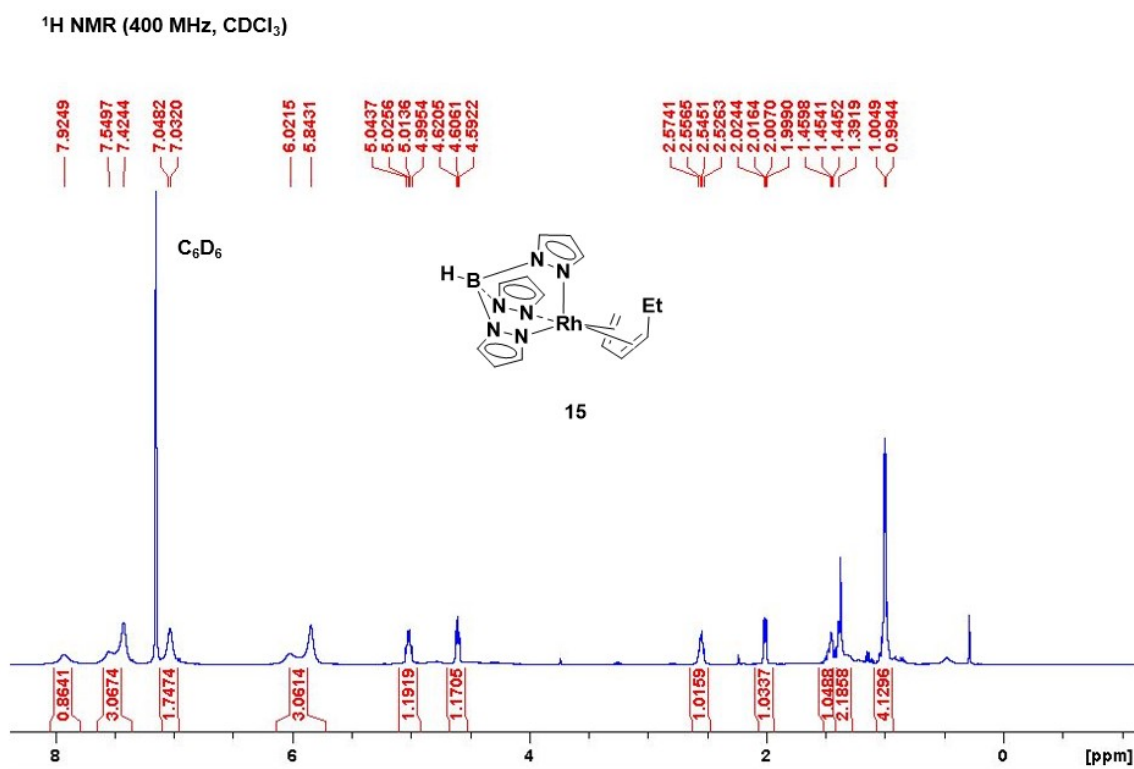

Figure S30. <sup>1</sup>H NMR spectrum of compound 15.

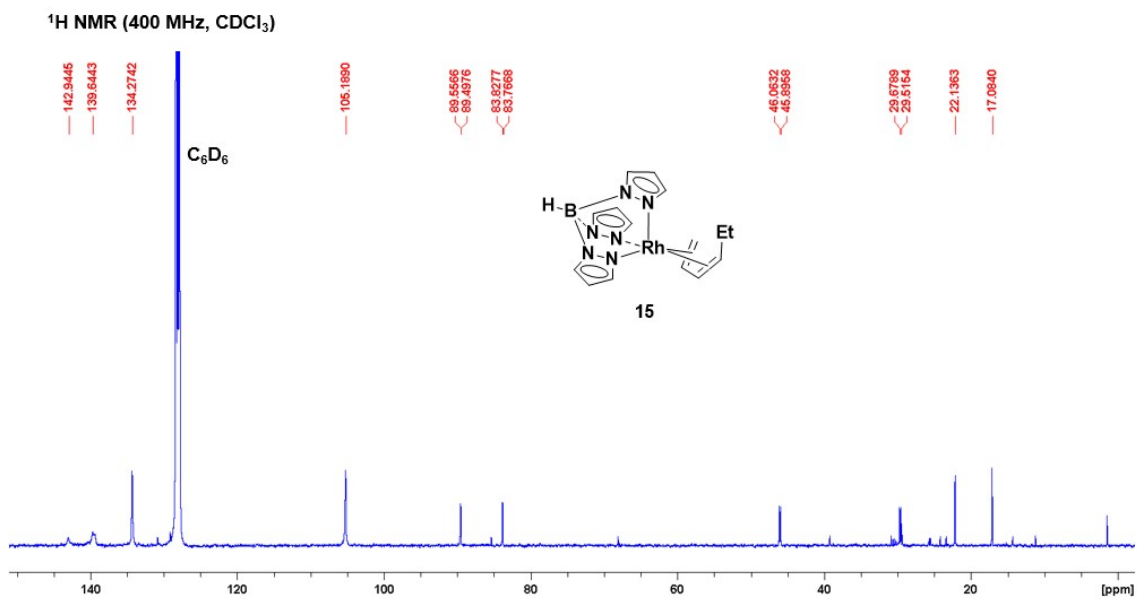

Figure S31. <sup>13</sup>C{<sup>1</sup>H} NMR spectrum of compound **15**.

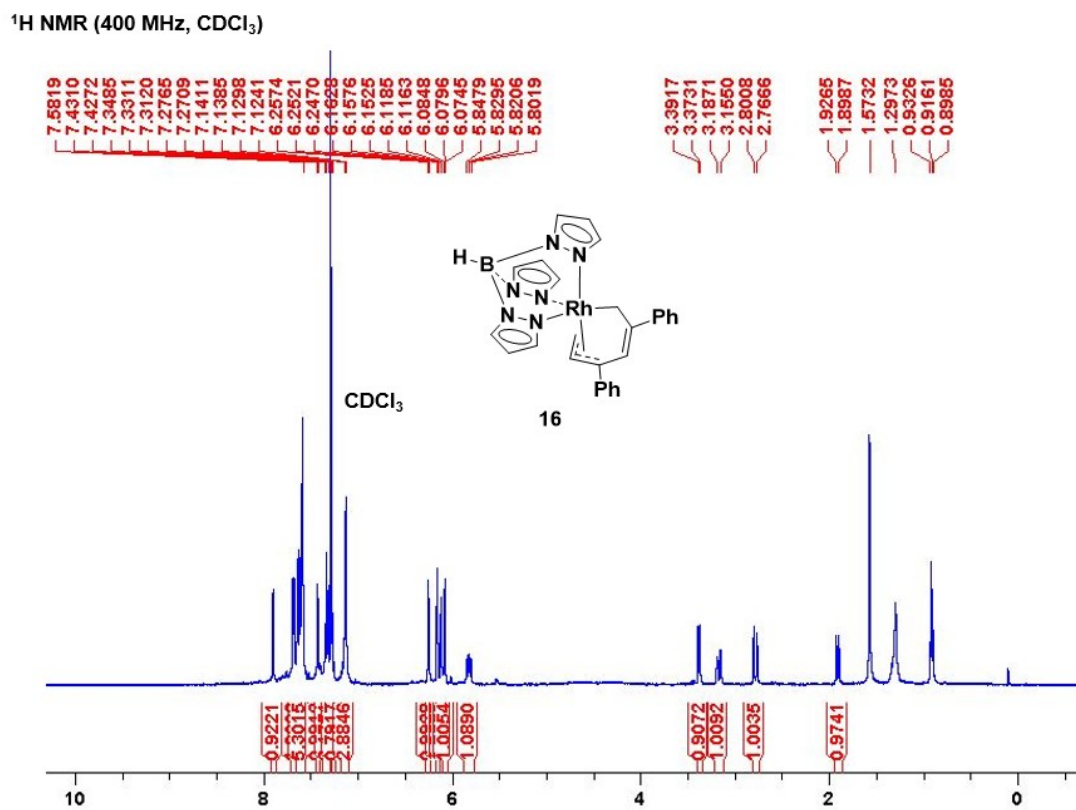

Figure S32. <sup>1</sup>H NMR spectrum of compound **16**.

$^{13}\text{C}\{^1\text{H}\}$  NMR (101 MHz,  $\text{CDCl}_3$ )

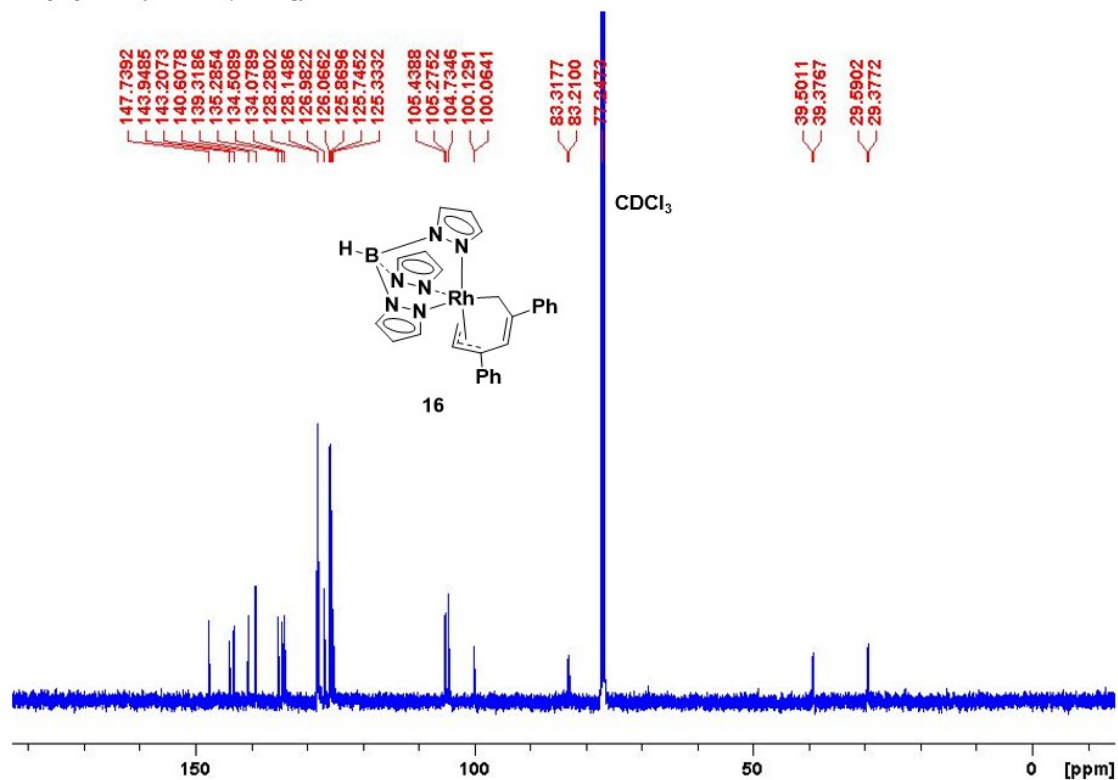

Figure S33.  $^{13}\text{C}\{^1\text{H}\}$  NMR spectrum of compound 16.

$^1\text{H}$  NMR (400 MHz,  $\text{CDCl}_3$ )

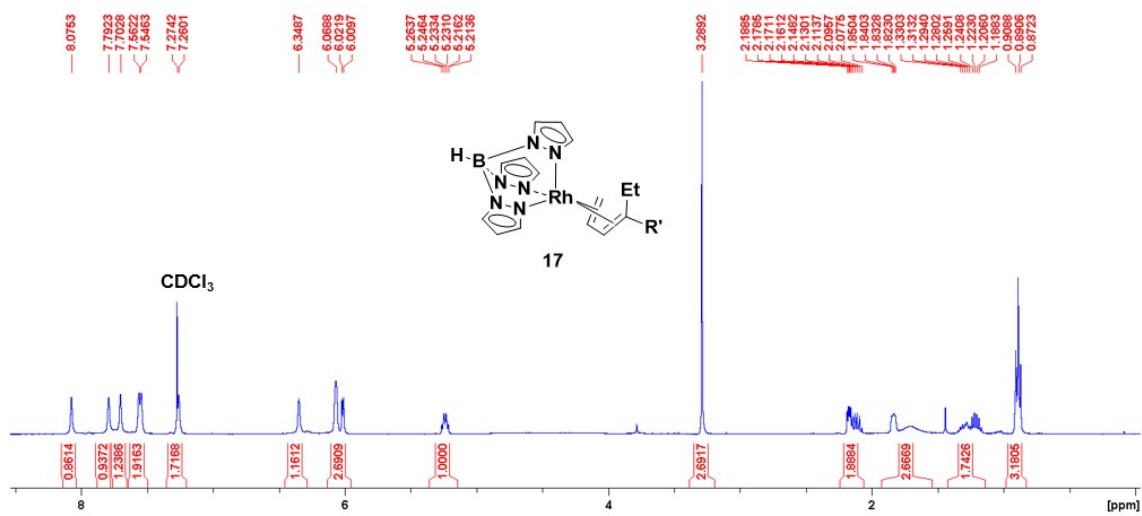

Figure S34.  $^1\text{H}$  NMR spectrum of compound 17 ( $\text{R}' = \text{CO}_2\text{Me}$ ).

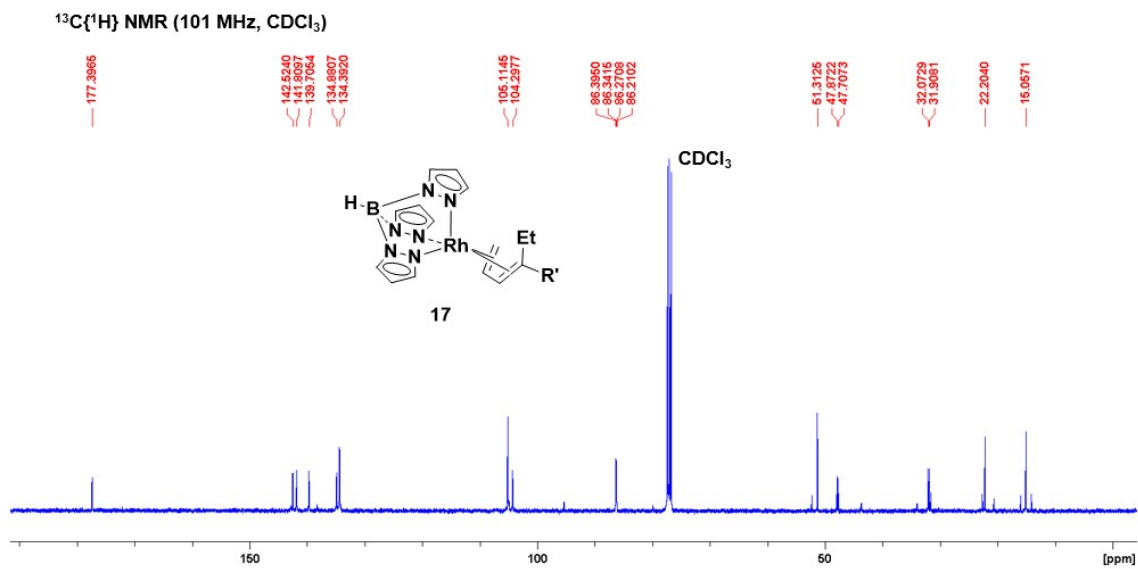

Figure S35. <sup>13</sup>C{<sup>1</sup>H} NMR spectrum of compound **17** (R' = CO<sub>2</sub>Me).

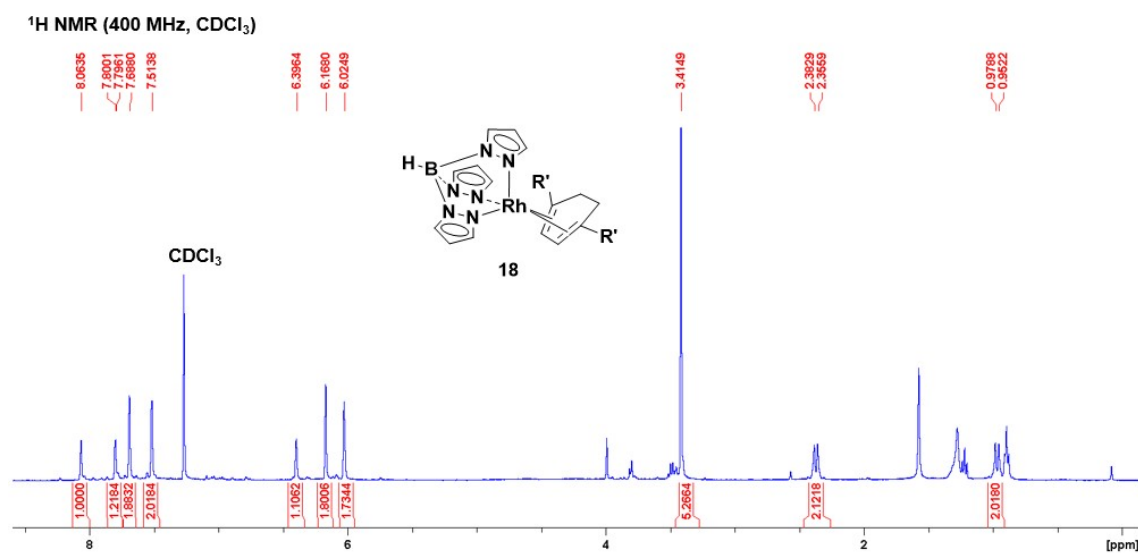

Figure S36. <sup>1</sup>H NMR spectrum of compound **18** (R' = CO<sub>2</sub>Me).

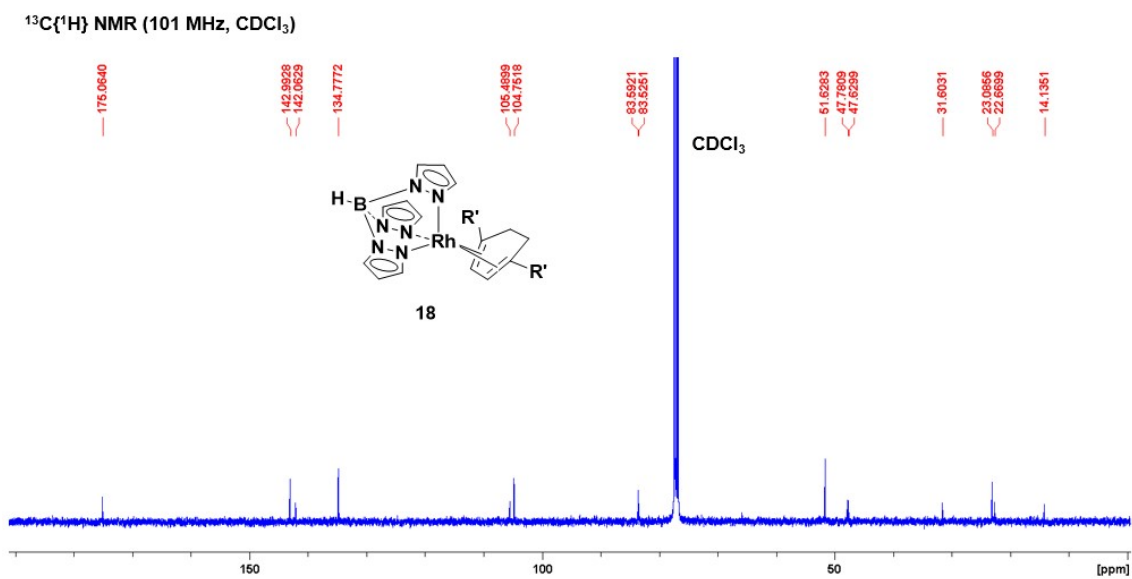

Figure S37.  $^{13}\text{C}\{^1\text{H}\}$  NMR spectrum of compound **18** ( $\text{R}' = \text{CO}_2\text{Me}$ ).

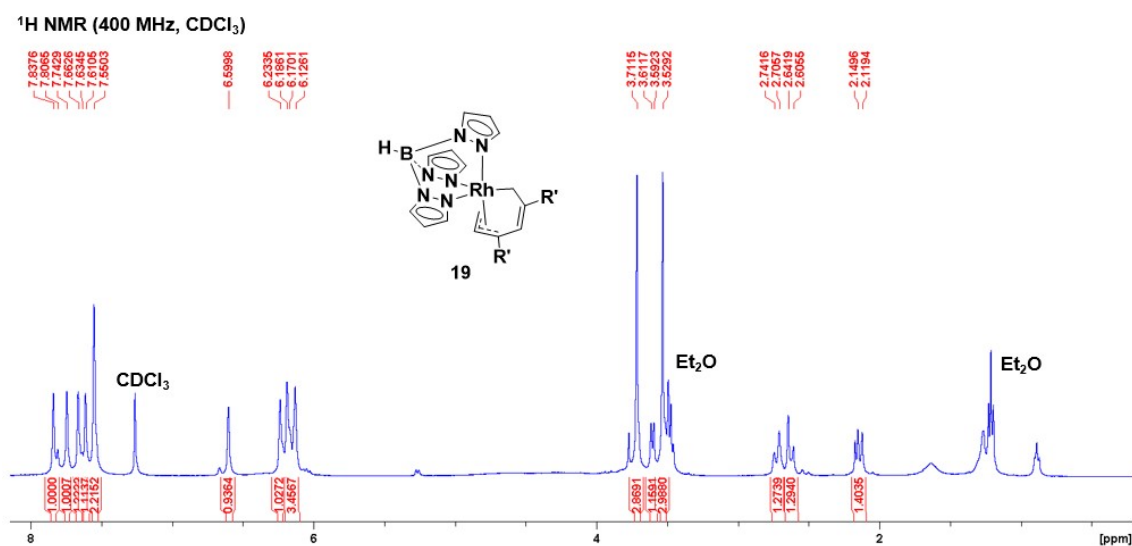

Figure S38.  $^1\text{H}$  NMR spectrum of compound **19** ( $\text{R}' = \text{CO}_2\text{Me}$ ).

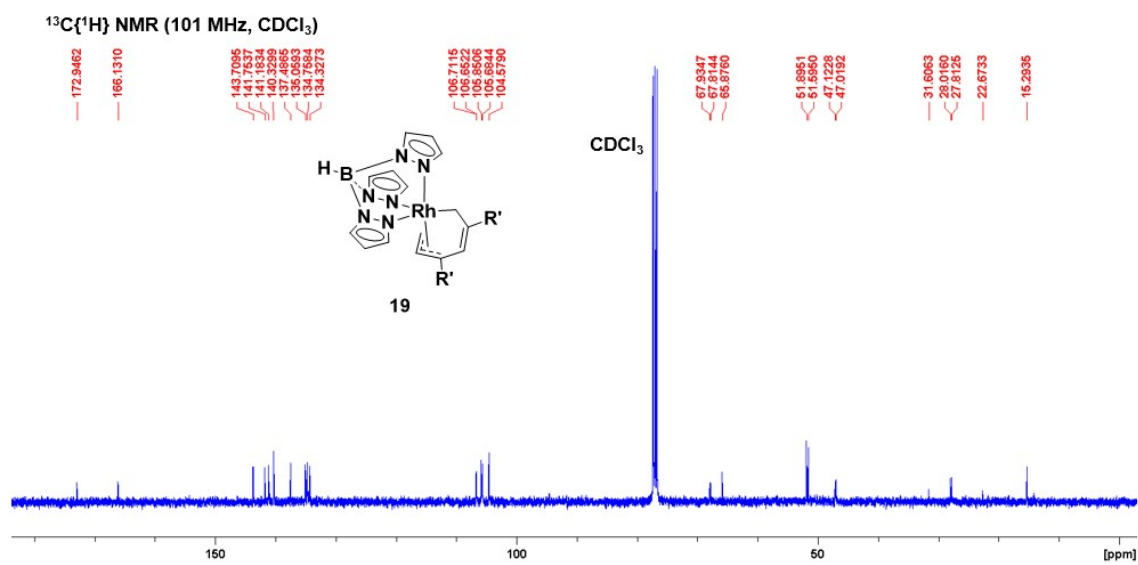

**Figure S39.**  $^{13}\text{C}\{^1\text{H}\}$  NMR spectrum of compound **19** ( $\text{R}' = \text{CO}_2\text{Me}$ ).
